# Supplementary material for: Gender Disparities in Epidemiology, Treatment, and Outcome for Head and Neck Cancer in Germany: A Population-Based Long-Term Analysis from 1996 to 2016 of the Thuringian Cancer Registry
Source: PubMed Central journal article supplement (PMC7698743; doi:10.3390/cancers12113418), 2020-11-18
Supplement: cancers-12-03418-s001.pdf [file cancers-12-03418-s001.pdf]

# Gender disparities in epidemiology, treatment, and outcome for head and neck cancer in Germany: A population-based long-term analysis from 1996 to 2016 of the Thuringian cancer registry

Andreas Dittberner, Benedikt Friedl, Andrea Wittig, Jens Buentzel, H. Kaftan, Daniel Böger, Andreas Müller, Stefan Schultze-Mosgau, Peter Schlattmann, Thomas Ernst, and Orlando Guntinas-Lichius

Supplementary Table S1

| Supplementary Table S1. Distribution of head and neck cancer patients according to clinical and demographic parameters. |               |      |
|-------------------------------------------------------------------------------------------------------------------------|---------------|------|
| Parameter                                                                                                               | Frequency (N) | %    |
| All                                                                                                                     | 8288          | 100  |
| Year of diagnosis                                                                                                       | 362           | 4.2  |
| 1996                                                                                                                    | 362           | 4.4  |
| 1997                                                                                                                    | 340           | 4.1  |
| 1998                                                                                                                    | 334           | 4.0  |
| 1999                                                                                                                    | 361           | 4.4  |
| 2000                                                                                                                    | 393           | 4.7  |
| 2001                                                                                                                    | 415           | 5.0  |
| 2002                                                                                                                    | 348           | 4.2  |
| 2003                                                                                                                    | 447           | 5.4  |
| 2004                                                                                                                    | 482           | 5.8  |
| 2005                                                                                                                    | 423           | 5.1  |
| 2006                                                                                                                    | 438           | 5.3  |
| 2007                                                                                                                    | 447           | 5.4  |
| 2008                                                                                                                    | 470           | 5.7  |
| 2009                                                                                                                    | 428           | 5.2  |
| 2010                                                                                                                    | 471           | 5.7  |
| 2011                                                                                                                    | 478           | 5.8  |
| 2012                                                                                                                    | 322           | 3.9  |
| 2013                                                                                                                    | 313           | 3.8  |
| 2014                                                                                                                    | 334           | 4.0  |
| 2015                                                                                                                    | 333           | 4.0  |
| 2016                                                                                                                    | 349           | 4.2  |
| Tumor registry region                                                                                                   |               |      |
| Jena                                                                                                                    | 2007          | 24.2 |
| Erfurt                                                                                                                  | 3226          | 38.9 |
| Gera                                                                                                                    | 997           | 12.0 |
| Nordhausen                                                                                                              | 646           | 7.8  |
| Suhl                                                                                                                    | 1412          | 17.0 |
| Patient with residence in Thuringia                                                                                     |               |      |
| Yes                                                                                                                     | 7502          | 90.5 |
| No                                                                                                                      | 786           | 9.5  |

|                                     |                |                      |
|-------------------------------------|----------------|----------------------|
| Gender                              |                |                      |
| Male                                | 6540           | 78.9                 |
| Female                              | 1748           | 21.1                 |
|                                     | <b>Mean±SD</b> | <b>Median, Range</b> |
| Age, years                          | 60.9±11.9      | 60, 12-100           |
| Follow-up of all patients, months   | 45.1±45.7      | 29.1, 0-268,9        |
| Follow-up of patients alive, months | 59.6±49.6      | 50.4, 0-268.9        |

### Supplementary Table S2

| <b>Supplementary Table S2. T classification in relation to N classification in head neck cancer patients*.</b> |      |     |      |     |      |
|----------------------------------------------------------------------------------------------------------------|------|-----|------|-----|------|
|                                                                                                                | N0   | N1  | N2   | N3  | all  |
| T1                                                                                                             | 1439 | 168 | 278  | 21  | 1906 |
| T2                                                                                                             | 917  | 230 | 570  | 62  | 1779 |
| T3                                                                                                             | 496  | 160 | 569  | 38  | 1263 |
| T4                                                                                                             | 484  | 224 | 1015 | 161 | 1884 |
| Sum                                                                                                            | 3336 | 782 | 2432 | 282 | 6832 |

\* AJCC 2017 Staging was not clearly specified in some patients: Tx = 1189 and Nx = 1411.

### Supplementary Table S3

| <b>Supplementary Table S3. Stage distribution for subsites of head and neck cancer.*</b> |         |          |           |          |      |
|------------------------------------------------------------------------------------------|---------|----------|-----------|----------|------|
| Subsite                                                                                  | Stage I | Stage II | Stage III | Stage IV | all  |
| Lip                                                                                      | 157     | 27       | 13        | 9        | 206  |
| Cavity of mouth                                                                          | 465     | 329      | 256       | 759      | 1809 |
| Oropharynx                                                                               | 153     | 169      | 266       | 1366     | 1954 |
| Nasopharynx                                                                              | 10      | 12       | 27        | 97       | 146  |
| Hypopharynx                                                                              | 18      | 28       | 104       | 671      | 821  |
| Larynx                                                                                   | 531     | 252      | 275       | 432      | 1490 |
| Nose and paranasal sinus                                                                 | 19      | 25       | 38        | 82       | 164  |
| Salivary gland                                                                           | 82      | 69       | 72        | 130      | 353  |
| Not specified                                                                            | 0       | 0        | 1         | 0        | 1    |
| Sum                                                                                      | 1435    | 911      | 1052      | 3546     | 6944 |

\*Because T or N were not clearly specified in some cases, stage grouping was not possible for all 8288

patients. Be aware that T and N classification rules and stage grouping guidelines differ for the different subsites.

**Supplementary Table S4**

**Supplementary Table S4.** Distribution of distant metastases in 362 M+ patients at primary diagnosis for the different subsites of head and neck cancer.

| <b>Subsite</b>           | <b>PUL</b> | <b>LYM</b> | <b>HEP</b> | <b>OSS</b> | <b>OTH</b> | <b>BRA</b> | <b>SKI</b> | <b>PLE</b> | <b>ADR</b> | <b>Total number of metastases</b> | <b>Number of patients</b> |
|--------------------------|------------|------------|------------|------------|------------|------------|------------|------------|------------|-----------------------------------|---------------------------|
| Cavity of mouth          | 31         | 10         | 7          | 12         | 6          | 1          | 4          | 1          | 1          | 73                                | 57                        |
| Oropharynx               | 71         | 19         | 13         | 18         | 8          | 3          | 3          | 3          | 2          | 140                               | 121                       |
| Nasopharynx              | 3          | 1          | 5          | 5          | 1          | 2          | 0          | 0          | 0          | 17                                | 12                        |
| Hypopharynx              | 63         | 27         | 9          | 7          | 7          | 5          | 2          | 2          | 2          | 124                               | 95                        |
| Larynx                   | 30         | 4          | 7          | 3          | 5          | 0          | 1          | 0          | 0          | 50                                | 43                        |
| Nose and paranasal sinus | 3          | 0          | 4          | 0          | 1          | 0          | 0          | 0          | 0          | 8                                 | 10                        |
| Salivary gland           | 12         | 5          | 7          | 4          | 2          | 5          | 1          | 0          | 1          | 37                                | 24                        |
| Sum                      | 213        | 66         | 52         | 49         | 30         | 16         | 11         | 6          | 6          | 449                               | 362                       |

Pulmonary PUL; Osseous OSS; Hepatic HEP; Brain BRA; Lymph nodes LYM;; Pleura PLE; Adrenal ADR; Skin SKI; Other OTH.

No distant metastases found in Bone marrow MAR, genitourinary tract GEN, and Peritoneum PER. No distant metastases detected in patients with lip cancer.

**Supplementary Table S5**

| <b>Supplementary Table S5. Relation of tumor stage to therapy strategy.</b> |                   |                    |                           |            |
|-----------------------------------------------------------------------------|-------------------|--------------------|---------------------------|------------|
| <b>Stage</b>                                                                | <b>No therapy</b> | <b>Monotherapy</b> | <b>Multimodal therapy</b> | <b>Sum</b> |
| <b>AJCC</b>                                                                 |                   |                    |                           |            |
| I                                                                           | 31                | 1075               | 329                       | 1435       |
| II                                                                          | 20                | 389                | 502                       | 911        |
| III                                                                         | 19                | 232                | 801                       | 1052       |
| IV                                                                          | 202               | 667                | 2677                      | 3546       |
| Unstaged                                                                    | 164               | 472                | 380                       | 1016       |
| All                                                                         | 436               | 2835               | 4689                      | 7960       |
| <b>SEER</b>                                                                 |                   |                    |                           |            |
| Localized                                                                   | 85                | 1701               | 1508                      | 3294       |
| Regionalized                                                                | 133               | 580                | 2563                      | 3276       |
| Distant                                                                     | 51                | 77                 | 232                       | 360        |
| Unstaged                                                                    | 167               | 477                | 386                       | 1030       |
| All                                                                         | 436               | 2835               | 4689                      | 7960       |

Stage grouping was not possible for all 8288 patients. AJCC = American Joint Committee on Cancer; SEER = Surveillance, Epidemiology, and End Results Program

Supplementary Table S6

| <b>Supplementary Table S6. Crude incidence of head and neck cancer for the different age cohorts from 1996 to 2016.</b> |             |             |             |             |             |             |             |             |             |             |             |             |
|-------------------------------------------------------------------------------------------------------------------------|-------------|-------------|-------------|-------------|-------------|-------------|-------------|-------------|-------------|-------------|-------------|-------------|
| <b>Parameter</b>                                                                                                        | <b>1996</b> | <b>1997</b> | <b>1998</b> | <b>1999</b> | <b>2000</b> | <b>2001</b> | <b>2002</b> | <b>2003</b> | <b>2004</b> | <b>2005</b> | <b>2006</b> | <b>2007</b> |
| <b>All, years</b>                                                                                                       |             |             |             |             |             |             |             |             |             |             |             |             |
| All ages                                                                                                                | 13.43       | 13.10       | 13.06       | 13.45       | 15.14       | 16.07       | 13.22       | 16.99       | 18.48       | 16.24       | 16.51       | 17.16       |
| 10-14                                                                                                                   | 0.00        | 0.00        | 0.00        | 0.00        | 0.00        | 0.00        | 0.00        | 0.00        | 0.00        | 0.00        | 0.00        | 1.43        |
| 15-19                                                                                                                   | 0.00        | 0.00        | 0.57        | 0.57        | 0.57        | 1.17        | 0.00        | 0.00        | 0.00        | 0.00        | 0.00        | 0.79        |
| 20-24                                                                                                                   | 0.74        | 0.00        | 0.00        | 0.69        | 0.66        | 0.00        | 0.00        | 0.00        | 0.00        | 0.00        | 0.00        | 0.66        |
| 25-29                                                                                                                   | 1.77        | 0.61        | 1.89        | 0.00        | 0.71        | 1.52        | 0.79        | 0.00        | 0.00        | 0.73        | 0.00        | 0.00        |
| 30-34                                                                                                                   | 0.49        | 0.51        | 0.00        | 0.55        | 1.14        | 1.18        | 0.00        | 0.65        | 2.10        | 2.25        | 1.61        | 0.00        |
| 35-39                                                                                                                   | 7.86        | 4.83        | 2.40        | 2.86        | 5.30        | 4.93        | 3.07        | 5.34        | 4.47        | 1.75        | 4.86        | 1.91        |
| 40-44                                                                                                                   | 9.65        | 10.19       | 12.79       | 5.12        | 11.70       | 9.58        | 5.97        | 16.71       | 7.33        | 12.83       | 7.57        | 8.89        |
| 45-49                                                                                                                   | 16.44       | 17.14       | 14.45       | 14.39       | 20.36       | 19.24       | 11.48       | 25.74       | 20.50       | 15.16       | 19.67       | 21.96       |
| 50-54                                                                                                                   | 23.98       | 25.38       | 15.15       | 29.86       | 27.45       | 20.26       | 25.98       | 23.37       | 28.99       | 33.80       | 28.84       | 30.54       |
| 55-59                                                                                                                   | 27.33       | 35.03       | 30.24       | 32.85       | 38.64       | 25.41       | 23.52       | 30.41       | 41.76       | 26.02       | 31.61       | 43.52       |
| 60-64                                                                                                                   | 32.51       | 29.01       | 41.18       | 32.38       | 32.55       | 44.57       | 34.35       | 34.84       | 45.94       | 32.39       | 39.61       | 26.80       |
| 65-69                                                                                                                   | 36.15       | 32.42       | 28.82       | 31.22       | 27.97       | 42.50       | 28.35       | 32.71       | 39.57       | 34.64       | 32.92       | 29.53       |
| 70-74                                                                                                                   | 28.25       | 25.18       | 24.78       | 32.36       | 25.22       | 30.25       | 30.24       | 41.43       | 31.39       | 31.23       | 32.33       | 21.20       |
| 75-79                                                                                                                   | 20.98       | 15.86       | 20.14       | 24.88       | 31.62       | 34.16       | 24.63       | 34.35       | 32.12       | 24.76       | 20.17       | 41.36       |
| 80-84                                                                                                                   | 16.91       | 9.82        | 23.73       | 14.34       | 18.57       | 35.93       | 30.92       | 19.04       | 29.20       | 30.22       | 17.43       | 21.94       |
| ≥85                                                                                                                     | 21.41       | 22.98       | 22.43       | 21.68       | 26.36       | 17.48       | 21.31       | 17.17       | 37.85       | 21.72       | 29.51       | 18.17       |
| <b>Male, years</b>                                                                                                      |             |             |             |             |             |             |             |             |             |             |             |             |
| All ages                                                                                                                | 22.33       | 23.04       | 21.30       | 22.33       | 24.66       | 26.66       | 22.12       | 28.00       | 30.10       | 27.11       | 27.10       | 27.38       |
| 10-14                                                                                                                   | 0.00        | 0.00        | 0.00        | 0.00        | 0.00        | 0.00        | 0.00        | 0.00        | 0.00        | 0.00        | 0.00        | 0.00        |
| 15-19                                                                                                                   | 0.00        | 0.00        | 1.10        | 0.00        | 1.11        | 1.13        | 0.00        | 0.00        | 0.00        | 0.00        | 0.00        | 0.00        |
| 20-24                                                                                                                   | 1.38        | 0.00        | 0.00        | 0.00        | 0.00        | 0.00        | 0.00        | 0.00        | 0.00        | 0.00        | 0.00        | 1.23        |
| 25-29                                                                                                                   | 1.11        | 1.14        | 0.00        | 0.00        | 1.31        | 2.78        | 1.43        | 0.00        | 0.00        | 1.34        | 0.00        | 0.00        |
| 30-34                                                                                                                   | 0.95        | 0.98        | 0.00        | 1.04        | 1.08        | 1.12        | 0.00        | 1.22        | 2.59        | 2.76        | 2.95        | 0.00        |
| 35-39                                                                                                                   | 13.41       | 6.59        | 4.68        | 4.64        | 10.28       | 8.60        | 3.95        | 8.22        | 7.51        | 2.23        | 9.26        | 2.41        |
| 40-44                                                                                                                   | 15.91       | 18.95       | 20.04       | 9.01        | 21.87       | 15.74       | 11.65       | 27.79       | 10.47       | 22.07       | 12.73       | 13.16       |
| 45-49                                                                                                                   | 26.26       | 25.74       | 26.13       | 27.17       | 32.80       | 30.62       | 18.44       | 43.31       | 31.95       | 26.62       | 26.36       | 34.98       |
| 50-54                                                                                                                   | 43.76       | 47.75       | 25.73       | 42.65       | 44.38       | 32.30       | 45.28       | 38.20       | 50.72       | 59.31       | 51.64       | 51.84       |
| 55-59                                                                                                                   | 48.39       | 62.76       | 49.50       | 58.79       | 63.35       | 48.73       | 41.48       | 53.58       | 76.14       | 49.20       | 59.17       | 71.90       |
| 60-64                                                                                                                   | 55.57       | 54.19       | 71.96       | 65.23       | 58.50       | 83.64       | 64.50       | 59.39       | 82.90       | 53.55       | 68.11       | 48.66       |
| 65-69                                                                                                                   | 68.87       | 60.90       | 44.99       | 58.51       | 45.96       | 74.64       | 53.79       | 59.09       | 71.47       | 62.58       | 57.84       | 48.02       |
| 70-74                                                                                                                   | 64.86       | 59.63       | 52.21       | 53.45       | 47.96       | 63.39       | 57.51       | 72.08       | 51.98       | 55.59       | 54.49       | 37.13       |
| 75-79                                                                                                                   | 34.22       | 43.08       | 53.44       | 46.57       | 68.38       | 59.79       | 50.43       | 70.77       | 65.46       | 46.61       | 33.41       | 70.39       |
| 80-84                                                                                                                   | 23.00       | 26.98       | 67.67       | 31.50       | 38.52       | 64.96       | 55.87       | 50.15       | 41.23       | 57.05       | 38.68       | 47.43       |
| ≥85                                                                                                                     | 54.94       | 53.08       | 41.63       | 51.28       | 52.00       | 44.32       | 24.13       | 26.42       | 67.06       | 49.15       | 54.83       | 40.10       |
| <b>Female, years</b>                                                                                                    |             |             |             |             |             |             |             |             |             |             |             |             |
| All ages                                                                                                                | 5.10        | 3.74        | 5.28        | 5.03        | 6.08        | 5.95        | 4.71        | 6.43        | 7.30        | 5.76        | 6.29        | 7.28        |
| 10-14                                                                                                                   | 0.00        | 0.00        | 0.00        | 0.00        | 0.00        | 0.00        | 0.00        | 0.00        | 0.00        | 0.00        | 0.00        | 2.92        |
| 15-19                                                                                                                   | 0.00        | 0.00        | 0.00        | 1.18        | 0.00        | 1.22        | 0.00        | 0.00        | 0.00        | 0.00        | 0.00        | 1.62        |
| 20-24                                                                                                                   | 0.00        | 0.00        | 0.00        | 1.50        | 1.43        | 0.00        | 0.00        | 0.00        | 0.00        | 0.00        | 0.00        | 0.00        |
| 25-29                                                                                                                   | 2.51        | 0.00        | 4.10        | 0.00        | 0.00        | 0.00        | 0.00        | 0.00        | 0.00        | 0.00        | 0.00        | 0.00        |
| 30-34                                                                                                                   | 0.00        | 0.00        | 0.00        | 0.00        | 1.20        | 1.25        | 0.00        | 0.00        | 1.52        | 1.65        | 0.00        | 0.00        |
| 35-39                                                                                                                   | 2.01        | 2.98        | 0.00        | 0.98        | 0.00        | 1.02        | 2.12        | 2.22        | 1.17        | 1.22        | 0.00        | 1.35        |
| 40-44                                                                                                                   | 3.11        | 1.04        | 5.23        | 1.05        | 1.04        | 3.10        | 0.00        | 5.04        | 4.02        | 3.05        | 2.08        | 4.32        |
| 45-49                                                                                                                   | 6.21        | 8.17        | 2.27        | 1.09        | 7.45        | 7.42        | 4.25        | 7.50        | 8.58        | 3.20        | 12.70       | 8.36        |

|                      |             |             |             |             |             |             |             |             |             |            |                    |                    |
|----------------------|-------------|-------------|-------------|-------------|-------------|-------------|-------------|-------------|-------------|------------|--------------------|--------------------|
| 50-54                | 4.35        | 2.99        | 4.55        | 16.93       | 10.21       | 7.94        | 6.13        | 8.10        | 6.66        | 7.61       | 5.41               | 8.69               |
| 55-59                | 7.08        | 8.33        | 11.67       | 7.79        | 14.72       | 2.78        | 5.99        | 7.72        | 7.83        | 2.97       | 4.04               | 14.97              |
| 60-64                | 11.62       | 6.15        | 13.12       | 2.26        | 8.63        | 8.38        | 6.32        | 11.95       | 11.40       | 12.55      | 12.81              | 6.13               |
| 65-69                | 11.10       | 9.91        | 15.87       | 8.76        | 12.87       | 15.17       | 6.58        | 9.95        | 11.76       | 10.10      | 10.88              | 13.12              |
| 70-74                | 8.93        | 6.03        | 9.01        | 19.40       | 10.41       | 7.50        | 10.69       | 18.79       | 15.77       | 12.33      | 14.84              | 8.47               |
| 75-79                | 15.13       | 3.81        | 5.44        | 15.34       | 15.24       | 22.36       | 12.17       | 15.61       | 13.75       | 11.95      | 12.02              | 22.67              |
| 80-84                | 14.59       | 3.38        | 7.25        | 7.89        | 10.99       | 24.83       | 21.38       | 7.17        | 24.63       | 19.85      | 8.89               | 11.15              |
| ≥85                  | 10.61       | 13.45       | 16.38       | 12.60       | 18.68       | 9.67        | 20.51       | 14.62       | 29.75       | 13.94      | 22.19              | 11.74              |
|                      | <b>2008</b> | <b>2009</b> | <b>2010</b> | <b>2011</b> | <b>2012</b> | <b>2013</b> | <b>2014</b> | <b>2015</b> | <b>2016</b> | <b>RR*</b> | <b>95%CI upper</b> | <b>95%CI lower</b> |
| <b>All, years</b>    |             |             |             |             |             |             |             |             |             |            |                    |                    |
| All ages             | 17.87       | 16.51       | 17.27       | 19.26       | 16.00       | 15.34       | 16.72       | 16.61       | 17.09       |            |                    |                    |
| 10-14                | 0.00        | 0.00        | 0.00        | 0.00        | 1.22        | 0.00        | 0.00        | 0.00        | 0.00        | 1.96       | 0.60               | 6.44               |
| 15-19                | 0.00        | 0.00        | 0.00        | 0.00        | 1.44        | 0.00        | 0.00        | 0.00        | 0.00        | 0.77       | 0.38               | 1.57               |
| 20-24                | 2.67        | 0.68        | 0.00        | 0.00        | 0.00        | 0.94        | 2.14        | 0.00        | 1.25        | 1.47       | 0.90               | 2.41               |
| 25-29                | 1.40        | 0.70        | 0.00        | 0.00        | 0.73        | 0.73        | 1.47        | 0.00        | 0.76        | 0.80       | 0.56               | 1.16               |
| 30-34                | 1.68        | 0.00        | 0.00        | 0.79        | 0.77        | 0.00        | 0.00        | 0.00        | 1.48        | 0.97       | 0.69               | 1.36               |
| 35-39                | 1.35        | 2.17        | 5.44        | 0.00        | 1.77        | 2.65        | 0.86        | 3.26        | 1.56        | 0.75       | 0.64               | 0.88               |
| 40-44                | 9.29        | 6.31        | 9.57        | 7.79        | 6.08        | 3.55        | 6.77        | 8.77        | 3.38        | 0.87       | 0.79               | 0.96               |
| 45-49                | 23.18       | 15.55       | 21.25       | 21.36       | 11.06       | 12.69       | 13.29       | 16.33       | 12.99       | 0.97       | 0.91               | 1.04               |
| 50-54                | 31.30       | 29.17       | 31.70       | 26.08       | 24.65       | 27.49       | 20.51       | 21.73       | 23.82       | 1.00       | 0.95               | 1.06               |
| 55-59                | 29.36       | 36.14       | 39.35       | 42.06       | 33.77       | 32.29       | 27.75       | 28.70       | 42.88       | 1.04       | 0.99               | 1.09               |
| 60-64                | 42.92       | 31.93       | 30.91       | 39.67       | 34.72       | 33.41       | 42.80       | 36.18       | 31.98       | 1.01       | 0.96               | 1.05               |
| 65-69                | 38.76       | 31.82       | 28.10       | 40.80       | 32.05       | 27.72       | 27.13       | 31.39       | 32.89       | 0.99       | 0.93               | 1.04               |
| 70-74                | 25.08       | 31.84       | 28.86       | 31.86       | 24.88       | 17.73       | 28.86       | 28.69       | 27.36       | 0.97       | 0.92               | 1.03               |
| 75-79                | 31.05       | 23.36       | 25.56       | 36.23       | 23.09       | 25.93       | 27.41       | 20.51       | 21.90       | 1.00       | 0.93               | 1.07               |
| 80-84                | 12.19       | 22.09       | 15.71       | 9.89        | 16.94       | 19.93       | 30.89       | 24.12       | 22.76       | 1.01       | 0.91               | 1.12               |
| ≥85                  | 15.06       | 14.45       | 3.94        | 20.96       | 23.73       | 14.01       | 11.74       | 22.63       | 14.17       | 0.89       | 0.80               | 1.00               |
| <b>Male, years</b>   |             |             |             |             |             |             |             |             |             |            |                    |                    |
| All ages             | 30.26       | 27.24       | 28.71       | 32.03       | 25.41       | 24.63       | 25.34       | 26.78       | 26.26       |            |                    |                    |
| 10-14                | 0.00        | 0.00        | 0.00        | 0.00        | 2.38        | 0.00        | 0.00        | 0.00        | 0.00        | 3.13       | 0.34               | 28.48              |
| 15-19                | 0.00        | 0.00        | 0.00        | 0.00        | 0.00        | 0.00        | 0.00        | 0.00        | 0.00        | 0.37       | 0.08               | 1.75               |
| 20-24                | 3.76        | 1.28        | 0.00        | 0.00        | 0.00        | 1.80        | 2.06        | 0.00        | 0.00        | 1.53       | 0.81               | 2.88               |
| 25-29                | 2.57        | 1.30        | 0.00        | 0.00        | 0.00        | 1.37        | 0.00        | 0.00        | 0.00        | 0.75       | 0.45               | 1.24               |
| 30-34                | 3.10        | 0.00        | 0.00        | 1.47        | 1.43        | 0.00        | 0.00        | 0.00        | 1.38        | 0.95       | 0.65               | 1.40               |
| 35-39                | 2.53        | 1.35        | 5.77        | 0.00        | 3.32        | 3.31        | 1.61        | 4.59        | 0.00        | 0.67       | 0.56               | 0.82               |
| 40-44                | 15.85       | 11.05       | 14.94       | 12.52       | 10.34       | 4.04        | 8.51        | 16.47       | 6.34        | 0.85       | 0.77               | 0.94               |
| 45-49                | 38.44       | 23.52       | 37.52       | 37.86       | 14.14       | 18.12       | 18.89       | 24.41       | 20.06       | 0.95       | 0.89               | 1.02               |
| 50-54                | 52.21       | 50.09       | 56.08       | 40.89       | 38.23       | 41.94       | 34.41       | 36.75       | 39.62       | 0.99       | 0.93               | 1.05               |
| 55-59                | 49.13       | 64.19       | 64.17       | 73.09       | 56.45       | 61.36       | 39.74       | 43.93       | 62.38       | 1.01       | 0.96               | 1.06               |
| 60-64                | 76.41       | 61.89       | 58.21       | 69.29       | 57.27       | 59.08       | 68.86       | 61.72       | 56.80       | 0.99       | 0.94               | 1.04               |
| 65-69                | 73.41       | 54.20       | 44.89       | 72.98       | 53.32       | 45.50       | 51.29       | 55.15       | 51.36       | 0.97       | 0.91               | 1.03               |
| 70-74                | 44.60       | 52.33       | 47.87       | 56.26       | 39.29       | 31.72       | 45.20       | 52.85       | 50.39       | 0.92       | 0.86               | 0.99               |
| 75-79                | 58.93       | 41.69       | 44.48       | 58.67       | 43.90       | 36.68       | 45.19       | 31.70       | 33.69       | 0.91       | 0.83               | 0.99               |
| 80-84                | 24.48       | 45.12       | 29.40       | 24.18       | 35.24       | 27.00       | 48.37       | 41.88       | 32.46       | 0.94       | 0.82               | 1.07               |
| ≥85                  | 18.74       | 8.91        | 8.38        | 31.50       | 65.90       | 33.91       | 18.85       | 46.83       | 27.69       | 0.88       | 0.75               | 1.04               |
| <b>Female, years</b> |             |             |             |             |             |             |             |             |             |            |                    |                    |
| All ages             | 5.87        | 6.12        | 6.18        | 6.99        | 6.94        | 6.39        | 8.41        | 6.74        | 8.16        |            |                    |                    |
| 10-14                | 0.00        | 0.00        | 0.00        | 0.00        | 0.00        | 0.00        | 0.00        | 0.00        | 0.00        | 1.41       | 0.30               | 6.54               |
| 15-19                | 0.00        | 0.00        | 0.00        | 0.00        | 2.97        | 0.00        | 0.00        | 0.00        | 0.00        | 1.10       | 0.47               | 2.56               |
| 20-24                | 1.43        | 0.00        | 0.00        | 0.00        | 0.00        | 0.00        | 2.22        | 0.00        | 2.66        | 1.38       | 0.63               | 3.05               |

|       |       |       |       |       |       |       |       |       |       |      |      |      |
|-------|-------|-------|-------|-------|-------|-------|-------|-------|-------|------|------|------|
| 25-29 | 0.00  | 0.00  | 0.00  | 0.00  | 1.59  | 0.00  | 3.17  | 0.00  | 1.64  | 0.87 | 0.51 | 1.48 |
| 30-34 | 0.00  | 0.00  | 0.00  | 0.00  | 0.00  | 0.00  | 0.00  | 0.00  | 1.60  | 1.03 | 0.51 | 2.06 |
| 35-39 | 0.00  | 3.12  | 5.07  | 0.00  | 0.00  | 1.89  | 0.00  | 1.75  | 3.34  | 1.07 | 0.76 | 1.51 |
| 40-44 | 2.26  | 1.19  | 3.74  | 2.69  | 1.42  | 3.00  | 4.80  | 0.00  | 0.00  | 0.95 | 0.74 | 1.23 |
| 45-49 | 7.22  | 7.19  | 4.15  | 4.34  | 7.87  | 7.06  | 7.42  | 7.77  | 5.39  | 1.06 | 0.92 | 1.24 |
| 50-54 | 9.84  | 7.67  | 6.55  | 10.97 | 10.81 | 12.80 | 6.36  | 6.42  | 7.66  | 1.06 | 0.93 | 1.23 |
| 55-59 | 9.43  | 7.93  | 14.44 | 11.19 | 11.23 | 3.39  | 15.82 | 13.50 | 23.39 | 1.20 | 1.06 | 1.35 |
| 60-64 | 11.06 | 3.21  | 4.56  | 11.13 | 12.89 | 8.53  | 17.55 | 11.48 | 8.00  | 1.07 | 0.95 | 1.22 |
| 65-69 | 7.89  | 11.81 | 13.01 | 11.91 | 12.84 | 11.57 | 5.03  | 9.52  | 15.82 | 1.00 | 0.88 | 1.13 |
| 70-74 | 9.33  | 15.10 | 13.17 | 11.65 | 12.86 | 6.03  | 15.16 | 8.35  | 7.89  | 0.99 | 0.88 | 1.12 |
| 75-79 | 12.48 | 10.75 | 12.21 | 20.16 | 7.97  | 18.01 | 14.10 | 12.02 | 12.89 | 1.03 | 0.91 | 1.16 |
| 80-84 | 6.64  | 10.93 | 8.66  | 2.18  | 6.62  | 15.80 | 20.30 | 13.05 | 16.57 | 1.00 | 0.85 | 1.18 |
| ≥85   | 13.96 | 16.12 | 2.58  | 17.59 | 9.73  | 7.08  | 9.15  | 13.40 | 8.80  | 0.89 | 0.76 | 1.04 |

\*RR = relative risk per five year period; CI = 95% confidence interval

Supplementary Table S7

| Supplementary Table S7. Crude incidence of head and neck cancer for four different age cohorts from 1996 to 2016. |             |             |             |             |             |             |             |             |             |       |       |       |
|-------------------------------------------------------------------------------------------------------------------|-------------|-------------|-------------|-------------|-------------|-------------|-------------|-------------|-------------|-------|-------|-------|
| Parameter                                                                                                         | 1996        | 1997        | 1998        | 1999        | 2000        | 2001        | 2002        | 2003        | 2004        | 2005  | 2006  | 2007  |
| <b>All, years</b>                                                                                                 |             |             |             |             |             |             |             |             |             |       |       |       |
| <50                                                                                                               | 4.87        | 4.37        | 4.30        | 3.26        | 5.65        | 5.32        | 3.07        | 7.22        | 5.29        | 5.12  | 5.37  | 5.71  |
| 50-64                                                                                                             | 27.97       | 30.37       | 29.53       | 31.86       | 32.91       | 30.92       | 28.50       | 29.48       | 38.37       | 30.93 | 32.61 | 33.94 |
| 65-79                                                                                                             | 29.33       | 25.87       | 25.22       | 29.92       | 28.30       | 36.21       | 28.04       | 35.90       | 34.63       | 31.15 | 29.64 | 29.67 |
| ≥80                                                                                                               | 18.89       | 16.27       | 23.06       | 18.33       | 21.40       | 27.19       | 26.88       | 17.26       | 32.30       | 27.08 | 22.16 | 20.40 |
| <b>Male, years</b>                                                                                                |             |             |             |             |             |             |             |             |             |       |       |       |
| <50                                                                                                               | 7.76        | 6.92        | 6.93        | 5.58        | 9.48        | 8.39        | 5.01        | 11.74       | 7.84        | 8.53  | 7.99  | 8.39  |
| 50-64                                                                                                             | 49.19       | 55.73       | 49.70       | 56.50       | 55.50       | 56.02       | 51.39       | 49.93       | 68.56       | 54.19 | 58.22 | 57.85 |
| 65-79                                                                                                             | 59.41       | 56.93       | 49.07       | 54.33       | 52.00       | 67.84       | 54.37       | 65.65       | 63.50       | 57.06 | 51.64 | 49.22 |
| ≥80                                                                                                               | 36.12       | 38.95       | 55.13       | 41.50       | 40.00       | 56.23       | 44.24       | 38.26       | 49.12       | 54.55 | 44.09 | 44.91 |
| <b>Female, years</b>                                                                                              |             |             |             |             |             |             |             |             |             |       |       |       |
| <50                                                                                                               | 1.76        | 1.61        | 1.47        | 0.74        | 1.49        | 1.98        | 0.94        | 2.26        | 2.49        | 1.37  | 2.47  | 2.73  |
| 50-64                                                                                                             | 7.74        | 6.14        | 10.24       | 8.22        | 11.12       | 6.58        | 6.16        | 9.45        | 8.69        | 7.95  | 7.17  | 10.11 |
| 65-79                                                                                                             | 11.32       | 6.86        | 10.47       | 14.42       | 12.74       | 14.70       | 9.55        | 14.36       | 13.06       | 11.29 | 12.41 | 14.11 |
| ≥80                                                                                                               | 12.79       | 8.42        | 12.05       | 10.51       | 15.15       | 17.39       | 21.00       | 10.12       | 26.55       | 17.56 | 14.37 | 11.41 |
|                                                                                                                   | <b>2008</b> | <b>2009</b> | <b>2010</b> | <b>2011</b> | <b>2012</b> | <b>2013</b> | <b>2014</b> | <b>2015</b> | <b>2016</b> |       |       |       |
| <b>All, years</b>                                                                                                 |             |             |             |             |             |             |             |             |             |       |       |       |
| <50                                                                                                               | 6.42        | 4.31        | 6.23        | 5.27        | 3.57        | 3.45        | 3.84        | 4.42        | 3.27        |       |       |       |
| 50-64                                                                                                             | 34.44       | 32.20       | 34.28       | 35.35       | 30.76       | 30.72       | 29.91       | 28.82       | 33.01       |       |       |       |
| 65-79                                                                                                             | 31.26       | 29.83       | 27.51       | 35.96       | 26.59       | 22.95       | 28.14       | 26.48       | 27.08       |       |       |       |
| ≥80                                                                                                               | 14.27       | 19.77       | 10.76       | 14.60       | 19.90       | 17.28       | 21.40       | 23.45       | 18.94       |       |       |       |
| <b>Male, years</b>                                                                                                |             |             |             |             |             |             |             |             |             |       |       |       |
| <50                                                                                                               | 10.51       | 6.46        | 10.04       | 8.92        | 4.87        | 4.79        | 4.88        | 6.95        | 4.33        |       |       |       |
| 50-64                                                                                                             | 58.87       | 58.17       | 59.57       | 59.73       | 50.03       | 53.24       | 46.86       | 47.34       | 53.05       |       |       |       |
| 65-79                                                                                                             | 58.23       | 50.84       | 45.39       | 62.64       | 45.06       | 36.91       | 47.11       | 46.19       | 44.58       |       |       |       |
| ≥80                                                                                                               | 25.73       | 32.95       | 22.38       | 26.65       | 45.92       | 29.50       | 37.39       | 43.73       | 30.70       |       |       |       |
| <b>Female, years</b>                                                                                              |             |             |             |             |             |             |             |             |             |       |       |       |
| <50                                                                                                               | 1.88        | 1.94        | 1.99        | 1.25        | 2.14        | 1.98        | 2.70        | 1.60        | 2.08        |       |       |       |
| 50-64                                                                                                             | 10.02       | 6.20        | 8.89        | 11.09       | 11.58       | 8.32        | 13.05       | 10.39       | 13.03       |       |       |       |
| 65-79                                                                                                             | 9.56        | 12.73       | 12.86       | 14.12       | 11.40       | 11.43       | 12.39       | 10.01       | 12.35       |       |       |       |
| ≥80                                                                                                               | 9.88        | 14.46       | 5.88        | 9.33        | 8.10        | 11.54       | 13.63       | 13.22       | 12.80       |       |       |       |



Supplementary Table S8

| <b>Supplementary Table S8. European standard rate (ESR) incidence of head and neck cancer for the different age cohorts from 1996 to 2016.</b> |             |             |             |             |             |             |             |             |             |             |             |             |
|------------------------------------------------------------------------------------------------------------------------------------------------|-------------|-------------|-------------|-------------|-------------|-------------|-------------|-------------|-------------|-------------|-------------|-------------|
| <b>Parameter</b>                                                                                                                               | <b>1996</b> | <b>1997</b> | <b>1998</b> | <b>1999</b> | <b>2000</b> | <b>2001</b> | <b>2002</b> | <b>2003</b> | <b>2004</b> | <b>2005</b> | <b>2006</b> | <b>2007</b> |
| All                                                                                                                                            | 12.25       | 11.77       | 11.64       | 12.08       | 13.44       | 13.79       | 11.28       | 14.16       | 15.35       | 13.03       | 13.18       | 13.41       |
| 10-14                                                                                                                                          | 0.00        | 0.00        | 0.00        | 0.00        | 0.00        | 0.00        | 0.00        | 0.00        | 0.00        | 0.00        | 0.00        | 0.08        |
| 15-19                                                                                                                                          | 0.00        | 0.00        | 0.03        | 0.03        | 0.04        | 0.07        | 0.00        | 0.00        | 0.00        | 0.00        | 0.00        | 0.05        |
| 20-24                                                                                                                                          | 0.05        | 0.00        | 0.00        | 0.05        | 0.04        | 0.00        | 0.00        | 0.00        | 0.00        | 0.00        | 0.00        | 0.04        |
| 25-29                                                                                                                                          | 0.12        | 0.04        | 0.13        | 0.00        | 0.05        | 0.11        | 0.06        | 0.00        | 0.00        | 0.05        | 0.00        | 0.00        |
| 30-34                                                                                                                                          | 0.04        | 0.04        | 0.00        | 0.04        | 0.08        | 0.09        | 0.00        | 0.05        | 0.15        | 0.16        | 0.12        | 0.00        |
| 35-39                                                                                                                                          | 0.57        | 0.35        | 0.17        | 0.21        | 0.38        | 0.36        | 0.22        | 0.39        | 0.32        | 0.13        | 0.35        | 0.14        |
| 40-44                                                                                                                                          | 0.70        | 0.74        | 0.93        | 0.37        | 0.85        | 0.70        | 0.44        | 1.22        | 0.53        | 0.94        | 0.55        | 0.65        |
| 45-49                                                                                                                                          | 1.18        | 1.24        | 1.04        | 1.04        | 1.47        | 1.39        | 0.83        | 1.86        | 1.48        | 1.09        | 1.42        | 1.58        |
| 50-54                                                                                                                                          | 1.66        | 1.75        | 1.05        | 2.06        | 1.90        | 1.40        | 1.79        | 1.61        | 2.00        | 2.33        | 1.99        | 2.11        |
| 55-59                                                                                                                                          | 1.75        | 2.24        | 1.94        | 2.10        | 2.47        | 1.63        | 1.51        | 1.95        | 2.67        | 1.67        | 2.02        | 2.79        |
| 60-64                                                                                                                                          | 1.89        | 1.68        | 2.39        | 1.88        | 1.89        | 2.58        | 1.99        | 2.02        | 2.66        | 1.88        | 2.30        | 1.55        |
| 65-69                                                                                                                                          | 1.68        | 1.51        | 1.34        | 1.46        | 1.30        | 1.98        | 1.32        | 1.52        | 1.84        | 1.61        | 1.53        | 1.38        |
| 70-74                                                                                                                                          | 1.14        | 1.02        | 1.00        | 1.30        | 1.02        | 1.22        | 1.22        | 1.67        | 1.27        | 1.26        | 1.30        | 0.85        |
| 75-79                                                                                                                                          | 0.69        | 0.52        | 0.66        | 0.82        | 1.04        | 1.12        | 0.81        | 1.13        | 1.06        | 0.82        | 0.66        | 1.36        |
| 80-84                                                                                                                                          | 0.40        | 0.23        | 0.56        | 0.34        | 0.43        | 0.84        | 0.72        | 0.45        | 0.68        | 0.71        | 0.41        | 0.51        |
| ≥85                                                                                                                                            | 0.38        | 0.41        | 0.40        | 0.38        | 0.47        | 0.31        | 0.38        | 0.30        | 0.67        | 0.39        | 0.52        | 0.32        |
|                                                                                                                                                | <b>2008</b> | <b>2009</b> | <b>2010</b> | <b>2011</b> | <b>2012</b> | <b>2013</b> | <b>2014</b> | <b>2015</b> | <b>2016</b> |             |             |             |
| All                                                                                                                                            | 13.76       | 12.32       | 12.88       | 13.94       | 11.58       | 10.96       | 11.70       | 11.75       | 11.93       |             |             |             |
| 10-14                                                                                                                                          | 0.00        | 0.00        | 0.00        | 0.00        | 0.07        | 0.00        | 0.00        | 0.00        | 0.00        |             |             |             |
| 15-19                                                                                                                                          | 0.00        | 0.00        | 0.00        | 0.00        | 0.09        | 0.00        | 0.00        | 0.00        | 0.00        |             |             |             |
| 20-24                                                                                                                                          | 0.18        | 0.05        | 0.00        | 0.00        | 0.00        | 0.06        | 0.14        | 0.00        | 0.08        |             |             |             |
| 25-29                                                                                                                                          | 0.10        | 0.05        | 0.00        | 0.00        | 0.05        | 0.05        | 0.10        | 0.00        | 0.05        |             |             |             |
| 30-34                                                                                                                                          | 0.12        | 0.00        | 0.00        | 0.06        | 0.06        | 0.00        | 0.00        | 0.00        | 0.11        |             |             |             |
| 35-39                                                                                                                                          | 0.10        | 0.16        | 0.39        | 0.00        | 0.13        | 0.19        | 0.06        | 0.24        | 0.11        |             |             |             |
| 40-44                                                                                                                                          | 0.68        | 0.46        | 0.70        | 0.57        | 0.44        | 0.26        | 0.49        | 0.64        | 0.25        |             |             |             |
| 45-49                                                                                                                                          | 1.67        | 1.12        | 1.53        | 1.54        | 0.80        | 0.91        | 0.96        | 1.18        | 0.94        |             |             |             |
| 50-54                                                                                                                                          | 2.16        | 2.01        | 2.19        | 1.80        | 1.70        | 1.90        | 1.42        | 1.50        | 1.64        |             |             |             |
| 55-59                                                                                                                                          | 1.88        | 2.31        | 2.52        | 2.69        | 2.16        | 2.07        | 1.78        | 1.84        | 2.74        |             |             |             |
| 60-64                                                                                                                                          | 2.49        | 1.85        | 1.79        | 2.30        | 2.01        | 1.94        | 2.48        | 2.10        | 1.85        |             |             |             |
| 65-69                                                                                                                                          | 1.81        | 1.48        | 1.31        | 1.90        | 1.49        | 1.29        | 1.26        | 1.46        | 1.53        |             |             |             |
| 70-74                                                                                                                                          | 1.01        | 1.28        | 1.16        | 1.28        | 1.00        | 0.71        | 1.16        | 1.16        | 1.10        |             |             |             |
| 75-79                                                                                                                                          | 1.02        | 0.77        | 0.84        | 1.19        | 0.76        | 0.85        | 0.90        | 0.68        | 0.72        |             |             |             |
| 80-84                                                                                                                                          | 0.29        | 0.52        | 0.37        | 0.23        | 0.40        | 0.47        | 0.72        | 0.56        | 0.53        |             |             |             |
| ≥85                                                                                                                                            | 0.27        | 0.26        | 0.07        | 0.37        | 0.42        | 0.25        | 0.21        | 0.40        | 0.25        |             |             |             |

Supplementary Table S9

| Supplementary Table S9. Crude incidence of head and neck cancer subsites from 1996 to 2016. |             |             |             |             |             |             |             |             |             |            |                    |                    |
|---------------------------------------------------------------------------------------------|-------------|-------------|-------------|-------------|-------------|-------------|-------------|-------------|-------------|------------|--------------------|--------------------|
| Parameter                                                                                   | 1996        | 1997        | 1998        | 1999        | 2000        | 2001        | 2002        | 2003        | 2004        | 2005       | 2006               | 2007               |
| All                                                                                         | 12.60       | 12.39       | 12.27       | 12.83       | 14.55       | 15.49       | 12.74       | 16.45       | 17.89       | 15.82      | 16.70              | 17.04              |
| Lip                                                                                         | 0.44        | 0.56        | 0.73        | 0.77        | 0.57        | 0.50        | 0.62        | 0.76        | 0.59        | 0.26       | 0.30               | 0.57               |
| Oral cavity                                                                                 | 3.17        | 2.46        | 2.87        | 3.01        | 4.18        | 3.84        | 2.66        | 4.53        | 4.31        | 3.88       | 4.65               | 4.65               |
| Oropharynx                                                                                  | 3.17        | 2.14        | 2.91        | 3.18        | 3.36        | 3.22        | 3.54        | 4.03        | 4.95        | 4.65       | 4.86               | 5.09               |
| Nasopharynx                                                                                 | 0.60        | 0.52        | 0.28        | 0.33        | 0.33        | 0.41        | 0.42        | 0.46        | 0.30        | 0.34       | 0.26               | 0.22               |
| Hypopharynx                                                                                 | 1.28        | 1.94        | 1.50        | 1.38        | 1.31        | 1.90        | 1.17        | 1.68        | 2.45        | 2.22       | 1.94               | 2.00               |
| Larynx                                                                                      | 3.05        | 3.31        | 2.55        | 3.18        | 3.65        | 4.05        | 3.21        | 3.99        | 3.89        | 3.28       | 3.06               | 2.78               |
| Nose/paranasal                                                                              | 0.24        | 0.52        | 0.53        | 0.12        | 0.25        | 0.37        | 0.33        | 0.17        | 0.30        | 0.04       | 0.56               | 0.74               |
| Middle ear                                                                                  | 0.00        | 0.00        | 0.00        | 0.00        | 0.00        | 0.00        | 0.04        | 0.00        | 0.00        | 0.00       | 0.00               | 0.00               |
| Salivary gland                                                                              | 0.64        | 0.85        | 0.89        | 0.81        | 0.82        | 0.99        | 0.67        | 0.84        | 1.06        | 1.15       | 1.03               | 1.00               |
| Not classifiable                                                                            | 0.00        | 0.08        | 0.00        | 0.04        | 0.08        | 0.21        | 0.08        | 0.00        | 0.04        | 0.00       | 0.04               | 0.00               |
|                                                                                             | <b>2008</b> | <b>2009</b> | <b>2010</b> | <b>2011</b> | <b>2012</b> | <b>2013</b> | <b>2014</b> | <b>2015</b> | <b>2016</b> | <b>RR*</b> | <b>95%CI upper</b> | <b>95%CI lower</b> |
| All                                                                                         | 17.95       | 16.57       | 18.20       | 19.15       | 14.80       | 14.45       | 15.47       | 15.39       | 16.12       | 1.07       | 1.05               | 1.09               |
| Lip                                                                                         | 0.44        | 0.40        | 0.58        | 0.23        | 0.51        | 0.18        | 0.32        | 0.28        | 0.46        | 0.84       | 0.76               | 0.94               |
| Oral cavity                                                                                 | 5.22        | 3.50        | 5.13        | 4.98        | 3.77        | 3.51        | 3.71        | 4.16        | 3.83        | 1.08       | 1.04               | 1.12               |
| Oropharynx                                                                                  | 5.09        | 4.34        | 5.13        | 5.44        | 4.64        | 4.94        | 4.26        | 4.95        | 4.90        | 1.16       | 1.12               | 1.20               |
| Nasopharynx                                                                                 | 0.26        | 0.35        | 0.22        | 0.46        | 0.37        | 0.18        | 0.32        | 0.32        | 0.37        | 0.90       | 0.79               | 1.02               |
| Hypopharynx                                                                                 | 1.49        | 2.39        | 2.10        | 1.60        | 1.79        | 1.85        | 1.81        | 1.66        | 2.08        | 1.06       | 1.01               | 1.12               |
| Larynx                                                                                      | 3.51        | 3.63        | 2.54        | 3.70        | 2.25        | 2.31        | 3.84        | 2.54        | 3.47        | 0.97       | 0.94               | 1.02               |
| Nose/paranasal                                                                              | 0.70        | 0.58        | 0.54        | 1.19        | 0.55        | 0.65        | 0.51        | 0.46        | 0.37        | 1.22       | 1.09               | 1.36               |
| Middle ear                                                                                  | 0.00        | 0.04        | 0.09        | 0.05        | 0.00        | 0.05        | 0.05        | 0.00        | 0.00        | 1.85       | 0.92               | 3.72               |
| Salivary gland                                                                              | 1.19        | 1.06        | 1.12        | 1.19        | 0.92        | 0.78        | 0.65        | 1.02        | 0.65        | 1.03       | 0.95               | 1.11               |
| Not classifiable                                                                            | 0.04        | 0.27        | 0.76        | 0.32        | 0.00        | 0.00        | 0.00        | 0.00        | 0.00        | 1.22       | 0.95               | 1.55               |

\*RR = relative risk per five year period, CI = 95% confidence interval

**Supplementary Table S10**

| <b>Supplementary Table S10. Crude incidence of head and neck cancer subsites from 1996 to 2016 for male patients.</b> |             |             |             |             |             |             |             |             |             |             |                    |                    |
|-----------------------------------------------------------------------------------------------------------------------|-------------|-------------|-------------|-------------|-------------|-------------|-------------|-------------|-------------|-------------|--------------------|--------------------|
| <b>Parameter</b>                                                                                                      | <b>1996</b> | <b>1997</b> | <b>1998</b> | <b>1999</b> | <b>2000</b> | <b>2001</b> | <b>2002</b> | <b>2003</b> | <b>2004</b> | <b>2005</b> | <b>2006</b>        | <b>2007</b>        |
| All                                                                                                                   | 20.32       | 21.13       | 19.69       | 20.68       | 22.96       | 24.87       | 20.79       | 26.92       | 28.64       | 26.17       | 27.09              | 27.43              |
| Lip                                                                                                                   | 0.74        | 0.99        | 1.08        | 1.25        | 0.67        | 0.67        | 0.93        | 0.77        | 0.77        | 0.35        | 0.44               | 0.88               |
| Oral cavity                                                                                                           | 5.12        | 4.31        | 4.65        | 4.34        | 6.03        | 5.56        | 3.56        | 6.92        | 6.11        | 5.98        | 7.08               | 7.50               |
| Oropharynx                                                                                                            | 5.12        | 3.31        | 4.49        | 5.00        | 5.45        | 5.14        | 5.94        | 6.58        | 8.09        | 7.88        | 8.04               | 8.29               |
| Nasopharynx                                                                                                           | 0.83        | 0.66        | 0.50        | 0.42        | 0.50        | 0.67        | 0.85        | 0.77        | 0.43        | 0.61        | 0.35               | 0.26               |
| Hypopharynx                                                                                                           | 2.40        | 3.65        | 2.74        | 2.42        | 2.43        | 3.37        | 2.12        | 3.08        | 4.64        | 3.64        | 3.58               | 3.35               |
| Larynx                                                                                                                | 5.37        | 6.30        | 4.74        | 6.09        | 6.37        | 7.76        | 6.36        | 7.43        | 7.05        | 5.98        | 5.59               | 5.03               |
| Nose/paranasal                                                                                                        | 0.33        | 0.75        | 0.58        | 0.17        | 0.25        | 0.51        | 0.42        | 0.17        | 0.43        | 0.09        | 0.61               | 0.88               |
| Middle ear                                                                                                            | 0.00        | 0.00        | 0.00        | 0.00        | 0.00        | 0.00        | 0.00        | 0.00        | 0.00        | 0.00        | 0.00               | 0.00               |
| Salivary gland                                                                                                        | 0.41        | 1.16        | 0.91        | 0.92        | 1.26        | 1.18        | 0.59        | 1.20        | 1.12        | 1.65        | 1.31               | 1.23               |
| Not classifiable                                                                                                      | 0.00        | 0.00        | 0.00        | 0.08        | 0.00        | 0.00        | 0.00        | 0.00        | 0.00        | 0.00        | 0.09               | 0.00               |
|                                                                                                                       | <b>2008</b> | <b>2009</b> | <b>2010</b> | <b>2011</b> | <b>2012</b> | <b>2013</b> | <b>2014</b> | <b>2015</b> | <b>2016</b> | <b>RR*</b>  | <b>95%CI upper</b> | <b>95%CI lower</b> |
| All                                                                                                                   | 30.35       | 26.93       | 28.73       | 30.76       | 23.44       | 23.27       | 23.32       | 24.79       | 24.82       | 1.06        | 1.03               | 1.08               |
| Lip                                                                                                                   | 0.62        | 0.36        | 0.72        | 0.37        | 0.75        | 0.19        | 0.28        | 0.47        | 0.47        | 0.78        | 0.69               | 0.90               |
| Oral cavity                                                                                                           | 8.10        | 5.21        | 7.68        | 7.81        | 5.23        | 5.16        | 4.89        | 5.80        | 5.32        | 1.06        | 1.01               | 1.10               |
| Oropharynx                                                                                                            | 9.26        | 7.63        | 9.04        | 9.11        | 7.75        | 8.26        | 6.40        | 8.51        | 7.37        | 1.17        | 1.12               | 1.21               |
| Nasopharynx                                                                                                           | 0.44        | 0.36        | 0.45        | 0.56        | 0.56        | 0.28        | 0.38        | 0.65        | 0.47        | 0.89        | 0.77               | 1.03               |
| Hypopharynx                                                                                                           | 2.76        | 4.22        | 3.61        | 2.97        | 3.36        | 3.38        | 3.48        | 2.99        | 3.83        | 1.06        | 1.00               | 1.13               |
| Larynx                                                                                                                | 6.59        | 6.91        | 4.70        | 6.69        | 4.20        | 3.94        | 7.05        | 4.68        | 6.16        | 0.97        | 0.93               | 1.01               |
| Nose/paranasal                                                                                                        | 1.07        | 0.63        | 0.81        | 1.67        | 0.75        | 0.75        | 0.56        | 0.65        | 0.56        | 1.24        | 1.08               | 1.42               |
| Middle ear                                                                                                            | 0.00        | 0.00        | 0.09        | 0.00        | 0.00        | 0.09        | 0.00        | 0.00        | 0.00        | 2.60        | 0.55               | 12.30              |
| Salivary gland                                                                                                        | 1.51        | 1.62        | 1.63        | 1.58        | 0.84        | 1.22        | 0.28        | 1.03        | 0.65        | 1.03        | 0.93               | 1.14               |
| Not classifiable                                                                                                      | 0.00        | 0.00        | 0.00        | 0.00        | 0.00        | 0.00        | 0.00        | 0.00        | 0.00        | 0.62        | 0.17               | 2.23               |

\*RR = relative risk per five year period, CI = 95% confidence interval

**Supplementary Table S11**

| <b>Supplementary Table S11. Crude incidence of head and neck cancer subsites from 1996 to 2016 for female patients.</b> |             |             |             |             |             |             |             |             |             |             |                        |                        |
|-------------------------------------------------------------------------------------------------------------------------|-------------|-------------|-------------|-------------|-------------|-------------|-------------|-------------|-------------|-------------|------------------------|------------------------|
| <b>Parameter</b>                                                                                                        | <b>1996</b> | <b>1997</b> | <b>1998</b> | <b>1999</b> | <b>2000</b> | <b>2001</b> | <b>2002</b> | <b>2003</b> | <b>2004</b> | <b>2005</b> | <b>2006</b>            | <b>2007</b>            |
| All                                                                                                                     | 5.31        | 4.09        | 5.21        | 5.33        | 6.50        | 6.48        | 4.99        | 6.35        | 7.49        | 5.79        | 6.62                   | 6.95                   |
| Lip                                                                                                                     | 0.16        | 0.16        | 0.39        | 0.32        | 0.48        | 0.32        | 0.33        | 0.74        | 0.42        | 0.17        | 0.17                   | 0.26                   |
| Oral cavity                                                                                                             | 1.33        | 0.71        | 1.18        | 1.75        | 2.41        | 2.19        | 1.80        | 2.23        | 2.58        | 1.85        | 2.29                   | 1.89                   |
| Oropharynx                                                                                                              | 1.33        | 1.02        | 1.42        | 1.43        | 1.36        | 1.38        | 1.23        | 1.57        | 1.91        | 1.51        | 1.78                   | 1.97                   |
| Nasopharynx                                                                                                             | 0.39        | 0.39        | 0.08        | 0.24        | 0.16        | 0.16        | 0.00        | 0.16        | 0.17        | 0.08        | 0.17                   | 0.17                   |
| Hypopharynx                                                                                                             | 0.23        | 0.31        | 0.32        | 0.40        | 0.24        | 0.49        | 0.25        | 0.33        | 0.33        | 0.84        | 0.34                   | 0.69                   |
| Larynx                                                                                                                  | 0.86        | 0.47        | 0.47        | 0.40        | 1.04        | 0.49        | 0.16        | 0.66        | 0.83        | 0.67        | 0.59                   | 0.60                   |
| Nose/paranasal                                                                                                          | 0.16        | 0.31        | 0.47        | 0.08        | 0.24        | 0.24        | 0.25        | 0.16        | 0.17        | 0.00        | 0.51                   | 0.60                   |
| Middle ear                                                                                                              | 0.00        | 0.00        | 0.00        | 0.00        | 0.00        | 0.00        | 0.08        | 0.00        | 0.00        | 0.00        | 0.00                   | 0.00                   |
| Salivary gland                                                                                                          | 0.86        | 0.55        | 0.87        | 0.72        | 0.40        | 0.81        | 0.74        | 0.49        | 1.00        | 0.67        | 0.76                   | 0.77                   |
| Not classifiable                                                                                                        | 0.00        | 0.16        | 0.00        | 0.00        | 0.16        | 0.40        | 0.16        | 0.00        | 0.08        | 0.00        | 0.00                   | 0.00                   |
|                                                                                                                         | <b>2008</b> | <b>2009</b> | <b>2010</b> | <b>2011</b> | <b>2012</b> | <b>2013</b> | <b>2014</b> | <b>2015</b> | <b>2016</b> | <b>RR*</b>  | <b>95%CI<br/>upper</b> | <b>95%CI<br/>lower</b> |
| All                                                                                                                     | 5.89        | 6.47        | 7.93        | 7.91        | 6.42        | 5.91        | 7.85        | 6.21        | 7.59        | 1.10        | 1.05                   | 1.15                   |
| Lip                                                                                                                     | 0.26        | 0.44        | 0.44        | 0.09        | 0.27        | 0.18        | 0.37        | 0.09        | 0.46        | 0.97        | 0.80                   | 1.16                   |
| Oral cavity                                                                                                             | 2.43        | 1.84        | 2.64        | 2.25        | 2.35        | 1.91        | 2.56        | 2.56        | 2.38        | 1.14        | 1.06                   | 1.23                   |
| Oropharynx                                                                                                              | 1.04        | 1.14        | 1.32        | 1.89        | 1.63        | 1.73        | 2.19        | 1.46        | 2.47        | 1.11        | 1.02                   | 1.21                   |
| Nasopharynx                                                                                                             | 0.09        | 0.35        | 0.00        | 0.36        | 0.18        | 0.09        | 0.27        | 0.00        | 0.27        | 0.90        | 0.71                   | 1.15                   |
| Hypopharynx                                                                                                             | 0.26        | 0.61        | 0.62        | 0.27        | 0.27        | 0.36        | 0.18        | 0.37        | 0.37        | 1.04        | 0.88                   | 1.22                   |
| Larynx                                                                                                                  | 0.52        | 0.44        | 0.44        | 0.81        | 0.36        | 0.73        | 0.73        | 0.46        | 0.82        | 1.01        | 0.88                   | 1.15                   |
| Nose/paranasal                                                                                                          | 0.35        | 0.52        | 0.26        | 0.72        | 0.36        | 0.55        | 0.46        | 0.27        | 0.18        | 1.18        | 0.99                   | 1.42                   |
| Middle ear                                                                                                              | 0.00        | 0.09        | 0.09        | 0.09        | 0.00        | 0.00        | 0.09        | 0.00        | 0.00        | 1.66        | 0.75                   | 3.66                   |
| Salivary gland                                                                                                          | 0.87        | 0.52        | 0.62        | 0.81        | 1.00        | 0.36        | 1.00        | 1.00        | 0.64        | 1.03        | 0.91                   | 1.16                   |
| Not classifiable                                                                                                        | 0.09        | 0.52        | 1.50        | 0.63        | 0.00        | 0.00        | 0.00        | 0.00        | 0.00        | 1.26        | 0.98                   | 1.62                   |

\*RR = relative risk per five year period, CI = 95% confidence interval

Supplementary Table S12

| Supplementary Table S12. Crude incidence of head and neck cancer for the different stages from 1996 to 2016. |             |             |             |             |             |             |             |             |             |            |                    |                    |
|--------------------------------------------------------------------------------------------------------------|-------------|-------------|-------------|-------------|-------------|-------------|-------------|-------------|-------------|------------|--------------------|--------------------|
| Parameter                                                                                                    | 1996        | 1997        | 1998        | 1999        | 2000        | 2001        | 2002        | 2003        | 2004        | 2005       | 2006               | 2007               |
| <b>All</b>                                                                                                   |             |             |             |             |             |             |             |             |             |            |                    |                    |
| Stage I                                                                                                      | 1.97        | 2.38        | 2.15        | 2.00        | 2.42        | 3.10        | 2.75        | 2.69        | 3.00        | 2.52       | 2.32               | 2.91               |
| Stage II                                                                                                     | 1.36        | 0.97        | 1.05        | 1.14        | 1.52        | 1.61        | 1.46        | 2.14        | 1.90        | 1.58       | 1.98               | 2.26               |
| Stage III                                                                                                    | 1.81        | 1.53        | 1.66        | 1.87        | 1.43        | 1.90        | 1.42        | 1.76        | 2.11        | 2.39       | 1.89               | 2.09               |
| Stage IV                                                                                                     | 5.90        | 5.49        | 4.86        | 4.81        | 5.41        | 6.11        | 4.91        | 6.55        | 7.74        | 6.14       | 7.66               | 6.61               |
| Unstaged                                                                                                     | 1.57        | 2.02        | 2.55        | 3.01        | 3.77        | 2.77        | 2.21        | 3.32        | 3.13        | 3.20       | 2.84               | 3.17               |
| <b>Men</b>                                                                                                   |             |             |             |             |             |             |             |             |             |            |                    |                    |
| Stage I                                                                                                      | 2.81        | 4.14        | 3.16        | 2.67        | 3.60        | 4.64        | 4.50        | 4.44        | 4.82        | 4.16       | 4.28               | 4.41               |
| Stage II                                                                                                     | 2.40        | 1.49        | 1.58        | 1.83        | 2.35        | 2.87        | 2.55        | 3.42        | 2.92        | 2.69       | 3.23               | 3.17               |
| Stage III                                                                                                    | 3.14        | 2.82        | 2.82        | 3.25        | 2.68        | 2.95        | 2.38        | 2.99        | 3.61        | 3.99       | 3.15               | 3.62               |
| Stage IV                                                                                                     | 10.49       | 10.19       | 8.14        | 8.09        | 9.22        | 10.88       | 8.57        | 11.62       | 13.76       | 10.66      | 12.58              | 10.67              |
| Unstaged                                                                                                     | 1.49        | 2.49        | 3.99        | 4.84        | 5.11        | 3.54        | 2.80        | 4.44        | 3.53        | 4.68       | 3.85               | 5.56               |
| <b>Women</b>                                                                                                 |             |             |             |             |             |             |             |             |             |            |                    |                    |
| Stage I                                                                                                      | 1.17        | 0.71        | 1.18        | 1.35        | 1.28        | 1.62        | 1.06        | 0.99        | 1.25        | 0.92       | 0.42               | 1.46               |
| Stage II                                                                                                     | 0.39        | 0.47        | 0.55        | 0.48        | 0.72        | 0.40        | 0.41        | 0.91        | 0.92        | 0.50       | 0.76               | 1.37               |
| Stage III                                                                                                    | 0.55        | 0.31        | 0.55        | 0.56        | 0.24        | 0.89        | 0.49        | 0.58        | 0.67        | 0.84       | 0.68               | 0.60               |
| Stage IV                                                                                                     | 1.56        | 1.02        | 1.74        | 1.67        | 1.76        | 1.54        | 1.39        | 1.65        | 1.91        | 1.76       | 2.88               | 2.66               |
| Unstaged                                                                                                     | 1.64        | 1.57        | 1.18        | 1.27        | 2.49        | 2.02        | 1.63        | 2.23        | 2.75        | 1.76       | 1.87               | 0.86               |
|                                                                                                              | <b>2008</b> | <b>2009</b> | <b>2010</b> | <b>2011</b> | <b>2012</b> | <b>2013</b> | <b>2014</b> | <b>2015</b> | <b>2016</b> | <b>RR*</b> | <b>95%CI upper</b> | <b>95%CI lower</b> |
| <b>All</b>                                                                                                   |             |             |             |             |             |             |             |             |             |            |                    |                    |
| Stage I                                                                                                      | 3.47        | 2.61        | 2.50        | 3.29        | 2.30        | 2.08        | 3.80        | 3.28        | 2.73        | 1.08       | 1.03               | 1.13               |
| Stage II                                                                                                     | 2.59        | 1.99        | 1.87        | 1.51        | 1.79        | 1.48        | 1.62        | 1.62        | 2.08        | 1.10       | 1.04               | 1.17               |
| Stage III                                                                                                    | 2.19        | 1.64        | 1.92        | 2.65        | 1.84        | 1.66        | 1.81        | 2.17        | 2.26        | 1.06       | 1.01               | 1.12               |
| Stage IV                                                                                                     | 6.37        | 7.26        | 7.76        | 8.68        | 7.77        | 7.90        | 6.99        | 7.39        | 7.76        | 1.12       | 1.09               | 1.15               |
| Unstaged                                                                                                     | 3.34        | 3.06        | 4.15        | 3.02        | 1.10        | 1.34        | 1.25        | 0.92        | 1.29        | 0.91       | 0.86               | 0.95               |
| <b>Men</b>                                                                                                   |             |             |             |             |             |             |             |             |             |            |                    |                    |
| Stage I                                                                                                      | 5.43        | 3.86        | 3.61        | 5.39        | 3.55        | 2.91        | 5.27        | 5.14        | 3.55        | 1.06       | 1.01               | 1.11               |
| Stage II                                                                                                     | 4.00        | 3.32        | 2.89        | 2.51        | 2.43        | 2.06        | 2.16        | 2.25        | 3.17        | 1.06       | 1.00               | 1.14               |
| Stage III                                                                                                    | 3.92        | 2.96        | 3.16        | 4.46        | 3.08        | 2.81        | 2.73        | 3.55        | 3.45        | 1.04       | 0.98               | 1.10               |
| Stage IV                                                                                                     | 11.92       | 12.48       | 14.00       | 14.59       | 12.70       | 13.42       | 11.38       | 12.25       | 12.60       | 1.10       | 1.06               | 1.13               |
| Unstaged                                                                                                     | 5.07        | 4.31        | 5.06        | 3.81        | 1.68        | 2.06        | 1.79        | 1.59        | 2.05        | 0.93       | 0.88               | 0.98               |
| <b>Women</b>                                                                                                 |             |             |             |             |             |             |             |             |             |            |                    |                    |
| Stage I                                                                                                      | 1.56        | 1.40        | 1.41        | 1.26        | 1.09        | 1.27        | 2.37        | 1.46        | 1.92        | 1.13       | 1.03               | 1.23               |
| Stage II                                                                                                     | 1.21        | 0.70        | 0.88        | 0.54        | 1.18        | 0.91        | 1.10        | 1.00        | 1.01        | 1.23       | 1.09               | 1.39               |
| Stage III                                                                                                    | 0.52        | 0.35        | 0.70        | 0.90        | 0.63        | 0.55        | 0.91        | 0.82        | 1.10        | 1.16       | 1.02               | 1.32               |
| Stage IV                                                                                                     | 0.95        | 2.19        | 1.67        | 2.97        | 2.99        | 2.55        | 2.74        | 2.65        | 3.02        | 1.21       | 1.12               | 1.30               |
| Unstaged                                                                                                     | 1.65        | 1.84        | 3.26        | 2.25        | 0.54        | 0.64        | 0.73        | 0.27        | 0.55        | 0.86       | 0.79               | 0.93               |

\*RR = relative risk per five year period, CI = 95% confidence interval

Supplementary Table S13

| Supplementary Table S13. Relative proportion* of therapy strategies per year from 1996 to 2016. |             |             |             |             |             |             |             |             |             |             |                    |                    |
|-------------------------------------------------------------------------------------------------|-------------|-------------|-------------|-------------|-------------|-------------|-------------|-------------|-------------|-------------|--------------------|--------------------|
| Parameter                                                                                       | 1996        | 1997        | 1998        | 1999        | 2000        | 2001        | 2002        | 2003        | 2004        | 2005        | 2006               | 2007               |
| No therapy**                                                                                    | 0.06        | 0.05        | 0.08        | 0.08        | 0.07        | 0.04        | 0.06        | 0.07        | 0.05        | 0.05        | 0.03               | 0.04               |
| Chemotherapy alone                                                                              | 0.01        | 0.02        | 0.02        | 0.00        | 0.01        | 0.01        | 0.01        | 0.02        | 0.02        | 0.00        | 0.01               | 0.00               |
| Radiotherapy alone                                                                              | 0.12        | 0.09        | 0.10        | 0.10        | 0.13        | 0.08        | 0.10        | 0.07        | 0.06        | 0.07        | 0.05               | 0.04               |
| Radiochemotherapy/radio-immunotherapy                                                           | 0.12        | 0.13        | 0.11        | 0.12        | 0.13        | 0.12        | 0.13        | 0.15        | 0.12        | 0.13        | 0.10               | 0.11               |
| Surgery alone                                                                                   | 0.25        | 0.30        | 0.26        | 0.22        | 0.26        | 0.29        | 0.27        | 0.26        | 0.28        | 0.28        | 0.26               | 0.30               |
| Surgery and chemotherapy/biologicals                                                            | 0.01        | 0.01        | 0.02        | 0.03        | 0.00        | 0.02        | 0.01        | 0.02        | 0.02        | 0.02        | 0.02               | 0.01               |
| Surgery and radiotherapy                                                                        | 0.24        | 0.24        | 0.23        | 0.25        | 0.22        | 0.22        | 0.19        | 0.21        | 0.19        | 0.21        | 0.24               | 0.27               |
| Surgery and radiochemotherapy/radio-immunotherapy                                               | 0.18        | 0.17        | 0.19        | 0.21        | 0.19        | 0.23        | 0.23        | 0.20        | 0.25        | 0.22        | 0.29               | 0.24               |
| Monotherapy                                                                                     | 0.38        | 0.41        | 0.37        | 0.32        | 0.40        | 0.37        | 0.38        | 0.35        | 0.36        | 0.36        | 0.31               | 0.34               |
| Multimodal therapy                                                                              | 0.55        | 0.55        | 0.55        | 0.61        | 0.54        | 0.59        | 0.56        | 0.58        | 0.59        | 0.59        | 0.65               | 0.62               |
| Surgery part of concept                                                                         | 0.69        | 0.71        | 0.70        | 0.70        | 0.67        | 0.75        | 0.71        | 0.69        | 0.75        | 0.74        | 0.81               | 0.81               |
| Radiotherapy part of concept                                                                    | 0.67        | 0.63        | 0.63        | 0.68        | 0.66        | 0.65        | 0.65        | 0.63        | 0.64        | 0.64        | 0.68               | 0.65               |
| Chemotherapy/biological part of concept                                                         | 0.29        | 0.29        | 0.27        | 0.29        | 0.22        | 0.27        | 0.31        | 0.32        | 0.35        | 0.34        | 0.41               | 0.35               |
| Platin***                                                                                       | 0.27        | 0.26        | 0.25        | 0.25        | 0.21        | 0.24        | 0.29        | 0.27        | 0.32        | 0.31        | 0.39               | 0.32               |
| 5-Fluorouracil                                                                                  | 0.04        | 0.05        | 0.10        | 0.05        | 0.01        | 0.01        | 0.02        | 0.02        | 0.03        | 0.00        | 0.06               | 0.04               |
| Taxane****                                                                                      | 0.00        | 0.01        | 0.02        | 0.01        | 0.01        | 0.02        | 0.01        | 0.03        | 0.03        | 0.01        | 0.05               | 0.02               |
| Cetuximab                                                                                       | 0.00        | 0.00        | 0.00        | 0.00        | 0.00        | 0.00        | 0.00        | 0.00        | 0.01        | 0.00        | 0.05               | 0.06               |
| Monochemotherapy                                                                                | 0.23        | 0.19        | 0.12        | 0.18        | 0.16        | 0.20        | 0.23        | 0.23        | 0.26        | 0.30        | 0.30               | 0.28               |
| Polychemotherapy                                                                                | 0.06        | 0.10        | 0.15        | 0.10        | 0.07        | 0.08        | 0.08        | 0.10        | 0.10        | 0.04        | 0.11               | 0.07               |
|                                                                                                 | <b>2008</b> | <b>2009</b> | <b>2010</b> | <b>2011</b> | <b>2012</b> | <b>2013</b> | <b>2014</b> | <b>2015</b> | <b>2016</b> | <b>RR**</b> | <b>95%CI upper</b> | <b>95%CI lower</b> |
| No therapy***                                                                                   | 0.02        | 0.04        | 0.06        | 0.04        | 0.03        | 0.07        | 0.07        | 0.09        | 0.08        | 1.04        | 0.96               | 1.12               |
| Chemotherapy alone                                                                              | 0.00        | 0.01        | 0.01        | 0.01        | 0.01        | 0.00        | 0.02        | 0.01        | 0.01        | 0.96        | 0.80               | 1.16               |
| Radiotherapy alone                                                                              | 0.05        | 0.07        | 0.06        | 0.06        | 0.04        | 0.05        | 0.05        | 0.06        | 0.06        | 0.83        | 0.78               | 0.89               |
| Radiochemotherapy/radio-immunotherapy                                                           | 0.09        | 0.09        | 0.11        | 0.10        | 0.16        | 0.18        | 0.11        | 0.13        | 0.20        | 1.08        | 1.02               | 1.13               |
| Surgery alone                                                                                   | 0.29        | 0.28        | 0.23        | 0.31        | 0.32        | 0.22        | 0.34        | 0.27        | 0.29        | 1.07        | 1.03               | 1.10               |
| Surgery and chemotherapy/biologicals                                                            | 0.01        | 0.01        | 0.00        | 0.00        | 0.01        | 0.00        | 0.00        | 0.01        | 0.00        | 0.74        | 0.62               | 0.89               |
| Surgery and radiotherapy                                                                        | 0.30        | 0.23        | 0.23        | 0.24        | 0.14        | 0.18        | 0.19        | 0.18        | 0.14        | 0.98        | 0.94               | 1.02               |
| Surgery and radiochemotherapy/radio-immunotherapy                                               | 0.23        | 0.28        | 0.29        | 0.20        | 0.19        | 0.21        | 0.17        | 0.21        | 0.19        | 1.05        | 1.01               | 1.09               |
| Monotherapy                                                                                     | 0.34        | 0.35        | 0.31        | 0.38        | 0.37        | 0.27        | 0.42        | 0.35        | 0.36        | 1.00        | 0.96               | 1.04               |
| Multimodal therapy                                                                              | 0.64        | 0.61        | 0.64        | 0.58        | 0.60        | 0.66        | 0.52        | 0.56        | 0.56        | 1.33        | 1.26               | 1.40               |
| Surgery part of concept                                                                         | 0.83        | 0.80        | 0.76        | 0.79        | 0.72        | 0.67        | 0.73        | 0.69        | 0.64        | 1.04        | 1.02               | 1.06               |
| Radiotherapy part of concept                                                                    | 0.68        | 0.67        | 0.69        | 0.63        | 0.63        | 0.70        | 0.56        | 0.62        | 0.62        | 1.03        | 1.00               | 1.05               |
| Chemotherapy/biological part of concept                                                         | 0.33        | 0.38        | 0.42        | 0.35        | 0.47        | 0.48        | 0.35        | 0.38        | 0.43        | 1.16        | 1.12               | 1.19               |
| Platin****                                                                                      | 0.29        | 0.30        | 0.37        | 0.30        | 0.41        | 0.42        | 0.29        | 0.36        | 0.40        | 1.15        | 1.11               | 1.19               |

|                  |      |      |      |      |      |      |      |      |      |      |      |      |
|------------------|------|------|------|------|------|------|------|------|------|------|------|------|
| 5-Fluorouracil   | 0.06 | 0.09 | 0.09 | 0.17 | 0.30 | 0.26 | 0.16 | 0.19 | 0.19 | 1.85 | 1.72 | 1.98 |
| Taxane*****      | 0.03 | 0.04 | 0.05 | 0.02 | 0.03 | 0.02 | 0.02 | 0.01 | 0.00 | 1.10 | 0.98 | 1.25 |
| Cetuximab        | 0.06 | 0.15 | 0.09 | 0.09 | 0.11 | 0.10 | 0.07 | 0.05 | 0.03 | 2.06 | 1.85 | 2.29 |
| Monochemotherapy | 0.23 | 0.24 | 0.29 | 0.13 | 0.09 | 0.14 | 0.11 | 0.17 | 0.22 | 1.00 | 0.96 | 1.04 |
| Polychemotherapy | 0.10 | 0.13 | 0.13 | 0.18 | 0.27 | 0.25 | 0.16 | 0.18 | 0.18 | 1.33 | 1.26 | 1.40 |

\*Sum per year = 1; \*\*RR = relative risk per five year period; CI = 95% confidence interval; \*\*\*beyond best

supportive care; \*\*\*\*Cisplatin or carboplatin; \*\*\*\*\*paclitaxel or docetaxel

**Supplementary Table S14**

| <b>Supplementary Table S14. Distribution of recurrence/tumor progress in the population.</b> |                      |               |
|----------------------------------------------------------------------------------------------|----------------------|---------------|
| <b>Parameter</b>                                                                             | <b>Frequency (N)</b> | <b>%</b>      |
| All                                                                                          | 8288                 | 100           |
| Any recurrence                                                                               |                      |               |
| Yes                                                                                          | 1330                 | 16.0          |
| No                                                                                           | 6958                 | 84.0          |
| Locoregional recurrence                                                                      |                      |               |
| Yes                                                                                          | 921                  | 11.1          |
| No                                                                                           | 7367                 | 88.9          |
| Distant recurrence (rM+)                                                                     |                      |               |
| Yes                                                                                          | 621                  | 7.5           |
| No                                                                                           | 7667                 | 92.5          |
| Distant recurrence subsite (rM+)                                                             |                      |               |
| All*                                                                                         | 814                  | 100           |
| PUL                                                                                          | 333                  | 40.9          |
| OSS                                                                                          | 116                  | 14.3          |
| LYM                                                                                          | 91                   | 11.2          |
| HEP                                                                                          | 70                   | 8.6           |
| OTH                                                                                          | 73                   | 9.0           |
| SKI                                                                                          | 53                   | 6.5           |
| BRA                                                                                          | 32                   | 3.9           |
| PLE                                                                                          | 30                   | 3.7           |
| ADR                                                                                          | 9                    | 1.1           |
| PER                                                                                          | 7                    | 0.9           |
| Tumor progress                                                                               |                      |               |
| Yes                                                                                          | 681                  | 8.2           |
| No                                                                                           | 7607                 | 91.8          |
| Death                                                                                        |                      |               |
| Yes                                                                                          | 4481                 | 54.1          |
| No                                                                                           | 3807                 | 45.9          |
|                                                                                              | <b>Mean/Median</b>   | <b>95% CI</b> |
| Mean recurrence-free survival time, months**                                                 | 192.9                | 187.8-198.0   |
| Median recurrence-free survival time, months**                                               | NA                   | NA            |
| Mean overall survival time, months**                                                         | 91.3                 | 88.3-94.2     |
| Median overall survival time, months**                                                       | 54.3                 | 51.8-58.7     |

\*number of distant metastases higher than number of patients with M+

\*\*due to Kaplan-Meier calculation; CI = 95% upper and lower confidence interval



**Supplementary Table S15**

| <b>Supplementary Table S15. Association of baseline and tumor characteristics and on overall survival.</b> |                     |                    |                    |                   |
|------------------------------------------------------------------------------------------------------------|---------------------|--------------------|--------------------|-------------------|
| <b>Parameter</b>                                                                                           | <b>Dichotomized</b> | <b>2-year OS %</b> | <b>5-year OS %</b> | <b>log Rank p</b> |
| All                                                                                                        |                     | 65.4               | 48.5               |                   |
| Gender                                                                                                     | Male                | 63.4               | 46.2               | <b>&lt;0.0001</b> |
|                                                                                                            | Female              | 73.4               | 57.7               |                   |
| Age (median: 60 years)                                                                                     | <Median             | 68.3               | 52.2               | <b>&lt;0.0001</b> |
|                                                                                                            | >Median             | 62.5               | 44.7               |                   |
| Site                                                                                                       | Lip                 | 85.2               | 69.7               | <b>&lt;0.0001</b> |
|                                                                                                            | Oral cavity         | 64.4               | 46.8               |                   |
|                                                                                                            | Oropharynx          | 62.2               | 46.3               |                   |
|                                                                                                            | Nasopharynx         | 67.5               | 49.9               |                   |
|                                                                                                            | Hypopharynx         | 47.1               | 30.1               |                   |
|                                                                                                            | Larynx              | 75.3               | 56.8               |                   |
|                                                                                                            | Nose/paranasal      | 66.1               | 48.9               |                   |
|                                                                                                            | Middle ear          | 33.0               | 0                  |                   |
|                                                                                                            | Salivary gland      | 72.9               | 59.3               |                   |
|                                                                                                            | Not classifiable    | 0                  | 0                  |                   |
| T classification                                                                                           | T1                  | 87.8               | 69.5               | <b>&lt;0.0001</b> |
|                                                                                                            | T2                  | 76.8               | 54.8               |                   |
|                                                                                                            | T3                  | 67.1               | 41.8               |                   |
|                                                                                                            | T4                  | 46.4               | 26.6               |                   |
| T classification                                                                                           | T1/T2               | 82.6               | 62.5               | <b>&lt;0.0001</b> |
|                                                                                                            | T3/T4               | 54.7               | 32.7               |                   |
| N classification                                                                                           | N0                  | 82.5               | 61.7               | <b>&lt;0.0001</b> |
|                                                                                                            | N1                  | 68.2               | 45.3               |                   |
|                                                                                                            | N2                  | 53.3               | 35.9               |                   |
|                                                                                                            | N3                  | 31.7               | 19.3               |                   |
| N classification                                                                                           | N0                  | 79.8               | 61.7               | <b>&lt;0.0001</b> |
|                                                                                                            | N+                  | 57.9               | 36.7               |                   |
| M classification                                                                                           | M0                  | 71.4               | 50.8               | <b>&lt;0.0001</b> |
|                                                                                                            | M+                  | 26.4               | 9.9                |                   |

|                             |                      |      |      |                   |
|-----------------------------|----------------------|------|------|-------------------|
| UICC stage                  | I                    | 91.0 | 74.2 | <b>&lt;0.0001</b> |
|                             | II                   | 78.5 | 59.2 |                   |
|                             | III                  | 76.1 | 52.7 |                   |
|                             | IV                   | 50.3 | 33.9 |                   |
| UICC stage                  | I-II                 | 86.8 | 67.0 | <b>&lt;0.0001</b> |
|                             | III-IV               | 59.5 | 37.9 |                   |
| Histology                   | SCC                  | 64.2 | 46.9 | <b>&lt;0.0001</b> |
|                             | Other                | 72.1 | 57.1 |                   |
| Surgery*                    | No                   | 40.1 | 25.6 | <b>&lt;0.0001</b> |
|                             | Yes                  | 77.6 | 56.4 |                   |
| Radiotherapy*               | No                   | 69.8 | 55.5 | <b>&lt;0.0001</b> |
|                             | Yes                  | 63.1 | 44.7 |                   |
| Chemotherapy/immunotherapy* | No                   | 69.3 | 53.8 | <b>&lt;0.0001</b> |
|                             | Yes                  | 58.9 | 38.4 |                   |
| Therapy                     | Best supportive care | 31.8 | 23.2 | <b>&lt;0.0001</b> |
|                             | Monotherapy          | 69.7 | 55.1 |                   |
|                             | Multimodal therapy   | 65.7 | 46.7 |                   |
| Years of treatment          | 1996-2000            | 65.3 | 47.6 | 0.114             |
|                             | 2001-2005            | 65.2 | 47.6 |                   |
|                             | 2006-2010            | 67.5 | 50.0 |                   |
|                             | 2011-2016            | 64.8 | 49.2 |                   |

\*as part of therapy regime; SCC = Squamous cell carcinoma

**Supplementary Table S16**

| <b>Supplementary Table S16. Crude 5-year overall survival rates* in % from 1996 to 2016.</b> |                  |                  |                  |                  |
|----------------------------------------------------------------------------------------------|------------------|------------------|------------------|------------------|
| <b>Parameter</b>                                                                             | <b>1996-2000</b> | <b>2001-2005</b> | <b>2006-2010</b> | <b>2011-2016</b> |
| <b>All</b>                                                                                   | 47.6             | 47.6             | 50.0             | 49.2             |
| Lip                                                                                          | 73.4             | 65.3             | 70.6             | 63.4             |
| Oral cavity                                                                                  | 42.7             | 42.7             | 51.2             | 50.2             |
| Oropharynx                                                                                   | 42.0             | 46.9             | 47.7             | 49.2             |
| Nasopharynx                                                                                  | 55.4             | 42.6             | 44.2             | 54.2             |
| Hypopharynx                                                                                  | 27.6             | 29.7             | 32.2             | 30.8             |
| Larynx                                                                                       | 58.7             | 56.3             | 57.9             | 53.0             |
| Nose/paranasal                                                                               | 42.8             | 44.9             | 53.2             | 51.4             |
| Middle ear                                                                                   | NA               | NA               | NA               | 0                |
| Salivary gland                                                                               | 60.7             | 63.9             | 55.3             | 57.6             |
| Not classifiable                                                                             | 0                | NA               | NA               | NA               |
| <b>All</b>                                                                                   |                  |                  |                  |                  |
| Stage I                                                                                      | 74.8             | 69.7             | 78.8             | 72.3             |
| Stage II                                                                                     | 62.8             | 56.5             | 56.8             | 64.2             |
| Stage III                                                                                    | 50.0             | 54.0             | 54.7             | 54.4             |
| Stage IV                                                                                     | 30.0             | 31.3             | 36.9             | 36.1             |
| <b>Men</b>                                                                                   |                  |                  |                  |                  |
| Stage I                                                                                      | 75.9             | 69.9             | 78.5             | 72.0             |
| Stage II                                                                                     | 58.9             | 54.4             | 54.3             | 66.0             |
| Stage III                                                                                    | 47.8             | 51.3             | 52.0             | 54.2             |
| Stage IV                                                                                     | 28.0             | 29.2             | 35.2             | 34.0             |
| <b>Women</b>                                                                                 |                  |                  |                  |                  |
| Stage I                                                                                      | 71.7             | 69.1             | 79.9             | 72.1             |
| Stage II                                                                                     | 75.3             | 65.6             | 65.3             | 59.7             |
| Stage III                                                                                    | 62.9             | 66.0             | 68.9             | 54.5             |
| Stage IV                                                                                     | 40.5             | 44.1             | 48.9             | 45.0             |

\*related to tumor stage excluding unstaged cases

Supplemental Figures

Figure S1: Relative amount of patients regarding treatment (no therapy, monotherapy, multimodal therapy).

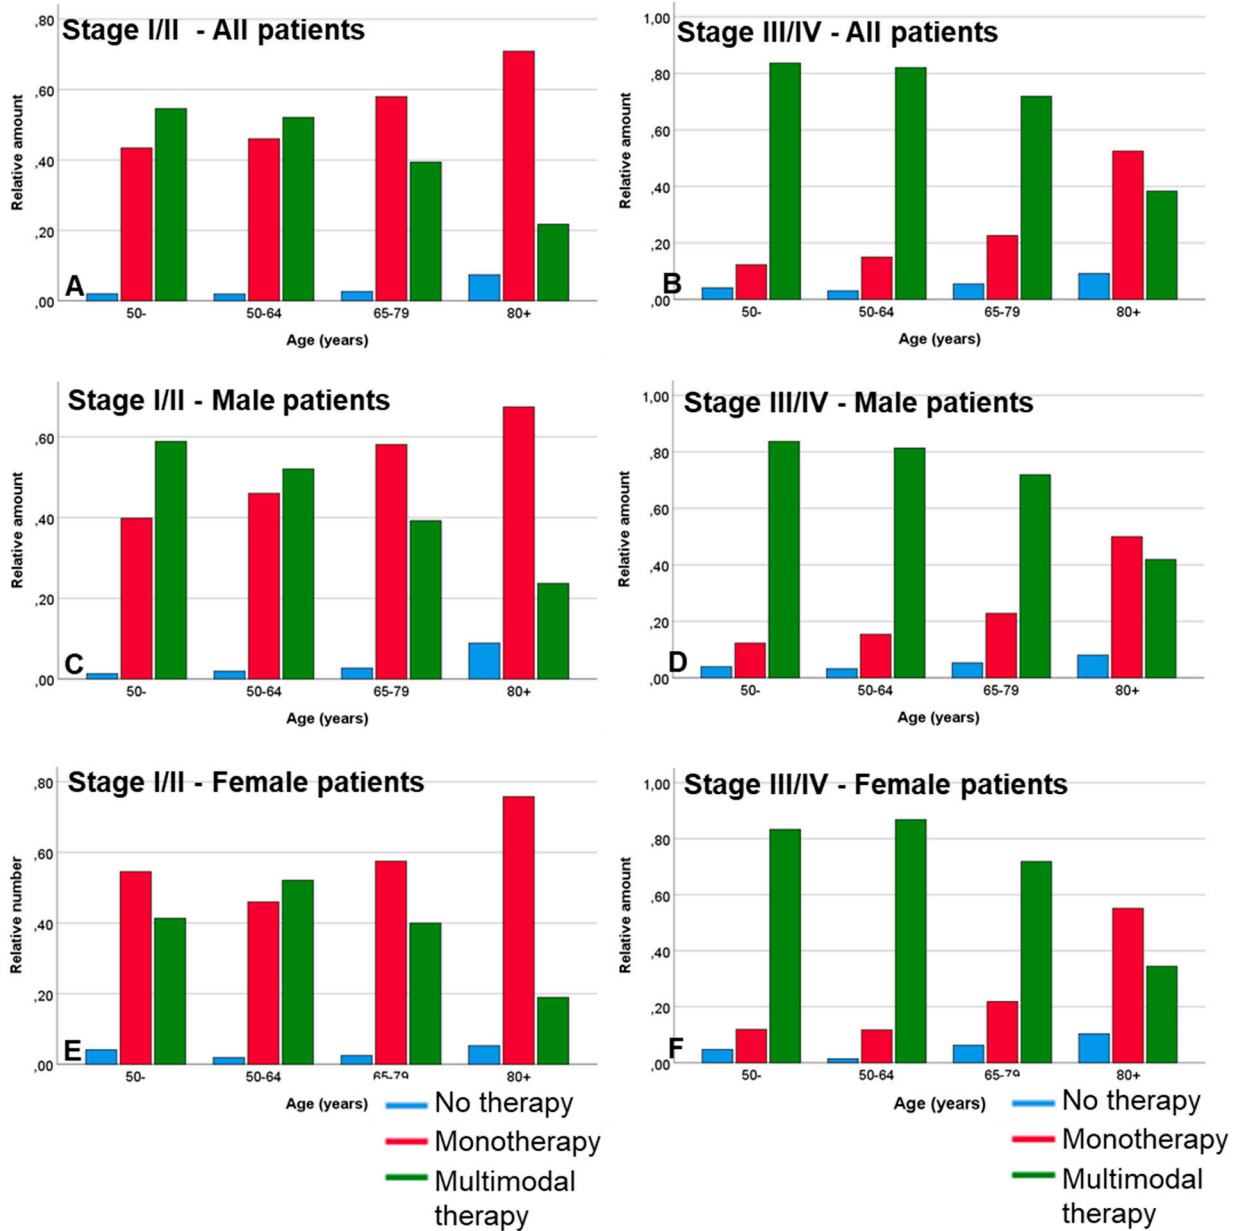

(A,C,E) Stage I/II. (B,D,F) Stage III/IV. (A,B) All patients. (C,D) Male patients. (E,F) Female patients.

Figure S2: Mean age in years over the years from 1996 to 2016.

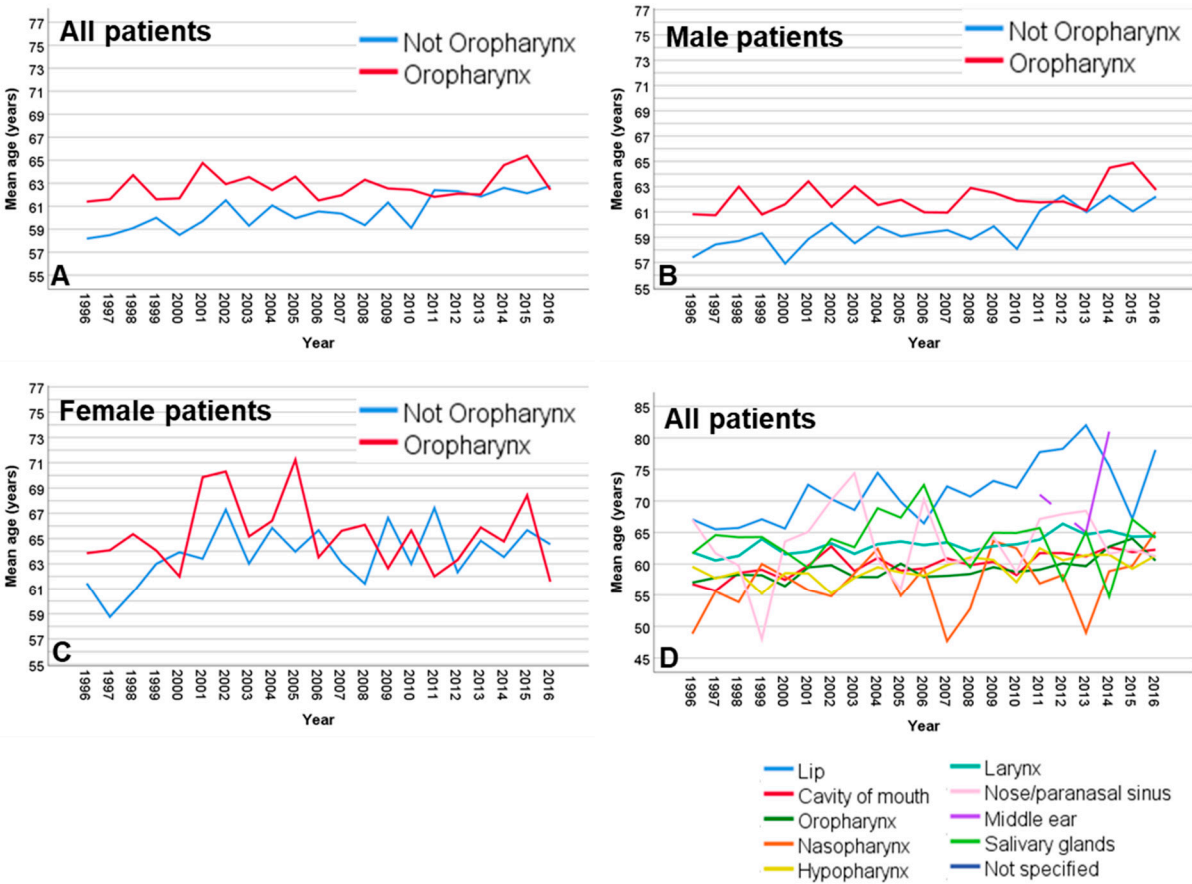

(A,B,C) Oropharyngeal cancer versus non-oropharyngeal cancer. (A) All patients. (B) Male patients. (C) Female patients. (D) All tumor subsites of all patients.

**Figure S3:** 5-year overall survival rates in percentage in relation to the year of primary diagnosis in 5-year periods from 1996 to 2016.

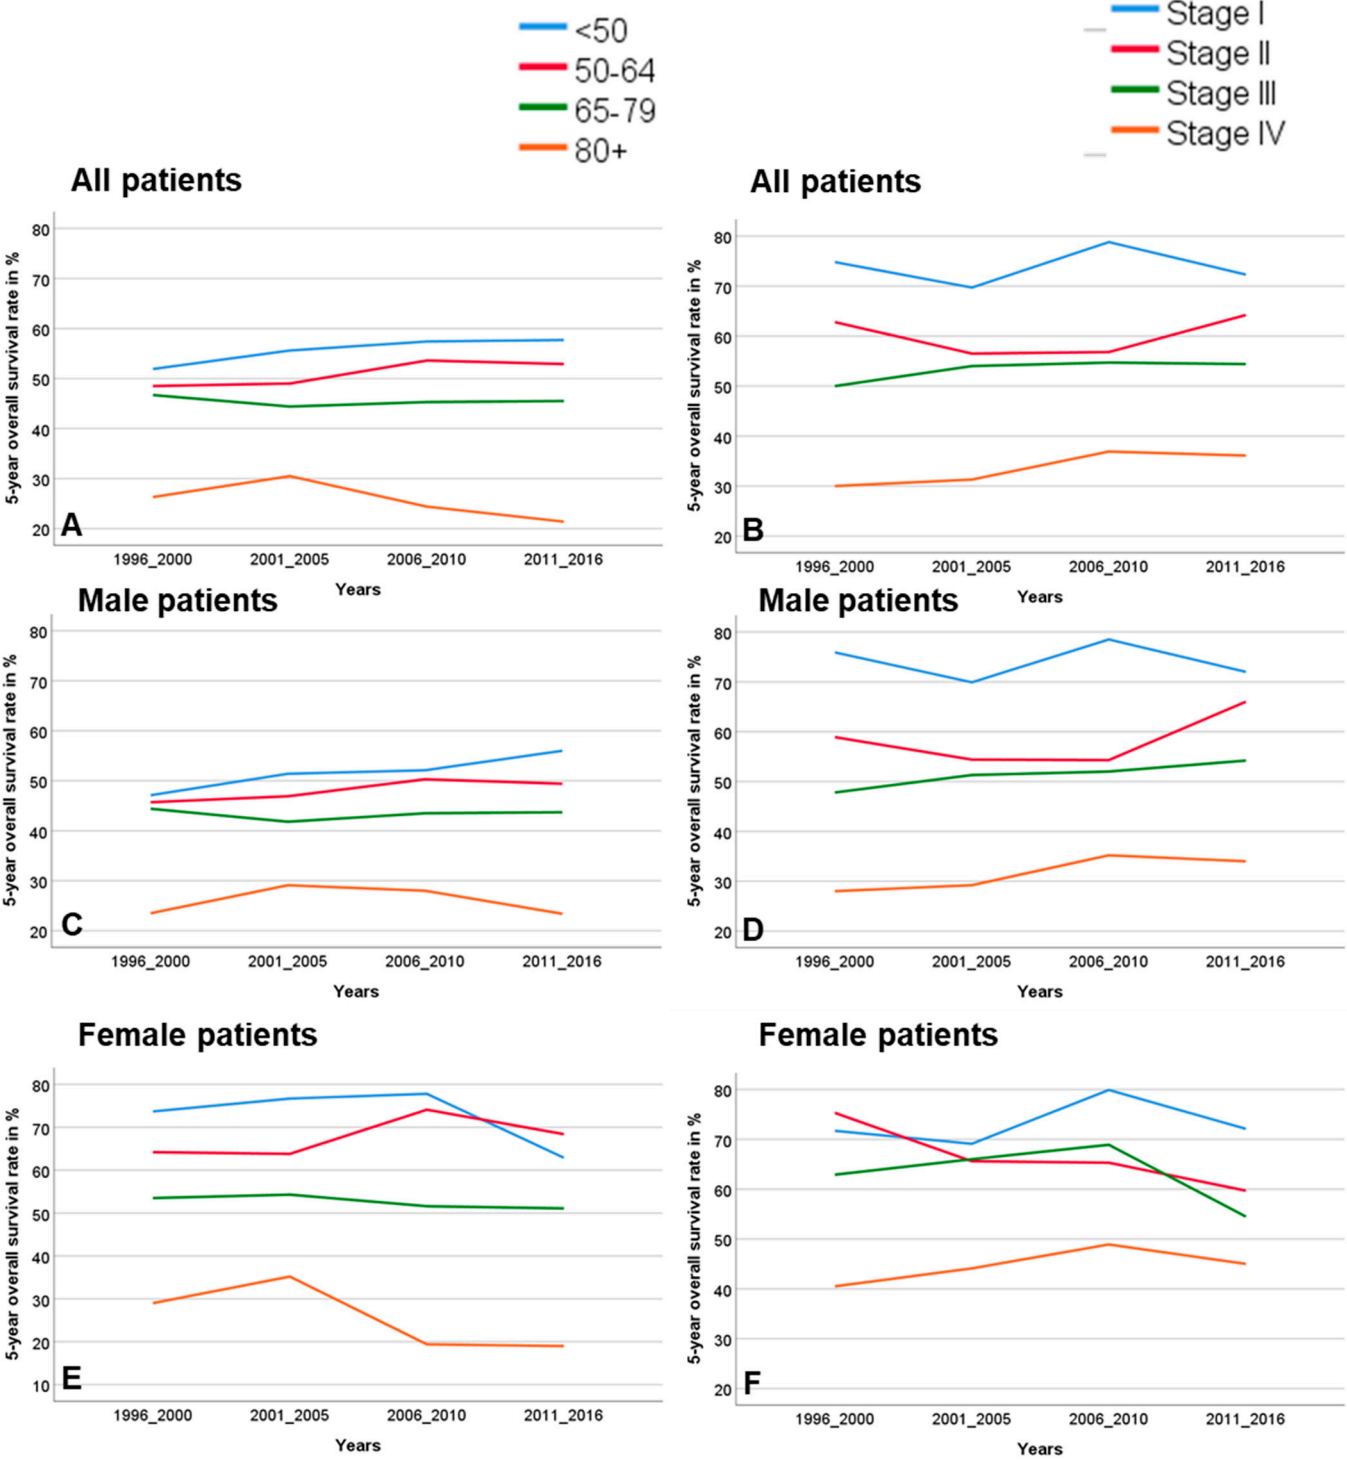

(A,C,E) For different age cohorts. (B,D,F) For different stages. (A,B) All patients. (C,D) Male patients. (E,F) Female patients.
